# Supplementary material for: Radical addition/spirocyclization cascade of tryptamine-derived isocyanides with aryl boronic acids: efficient access to spiroindoline derivatives
Source: Royal Society of Chemistry journal article supplement (doi:10.1039/d2qo01992b), 2023-01-01
Supplement: d2qo01992b1.pdf [file d2qo01992b1.pdf]

## Supporting Information

# Radical Addition/Spirocyclization Cascade of Tryptamine-Derived Isocyanides with Aryl Boronic Acids: Efficient Access to Spiroindoline Derivatives

Shuai Jiang,<sup>a</sup> Yu-Xin Huang,<sup>a</sup> Xiao-Feng Wang,<sup>a</sup> Xiao-Ping Xu<sup>\*ab</sup> and Shun-Jun Ji<sup>\*ac</sup>

<sup>a</sup> Key Laboratory of Organic Synthesis of Jiangsu Province, College of Chemistry, Chemical Engineering and Materials Science & Collaborative Innovation Center of Suzhou Nano Science and Technology, Soochow University, Suzhou 215123, People's Republic of China

<sup>b</sup> Innovation Center for Chemical Science, Soochow University, Suzhou, 215123, People's Republic of China

<sup>c</sup> Suzhou Baolidi Functional Materials Research Institute, Suzhou, 215144, People's Republic of China

## Table of Contents

|                                                                                         |    |
|-----------------------------------------------------------------------------------------|----|
| 1. $^1\text{H}$ , $^{13}\text{C}$ and $^{19}\text{F}$ NMR spectra of all products ..... | 3  |
| 2. Crystal data and structure refinement for 3ia. ....                                  | 34 |

# 1. $^1\text{H}$ , $^{13}\text{C}$ and $^{19}\text{F}$ NMR spectra of all products

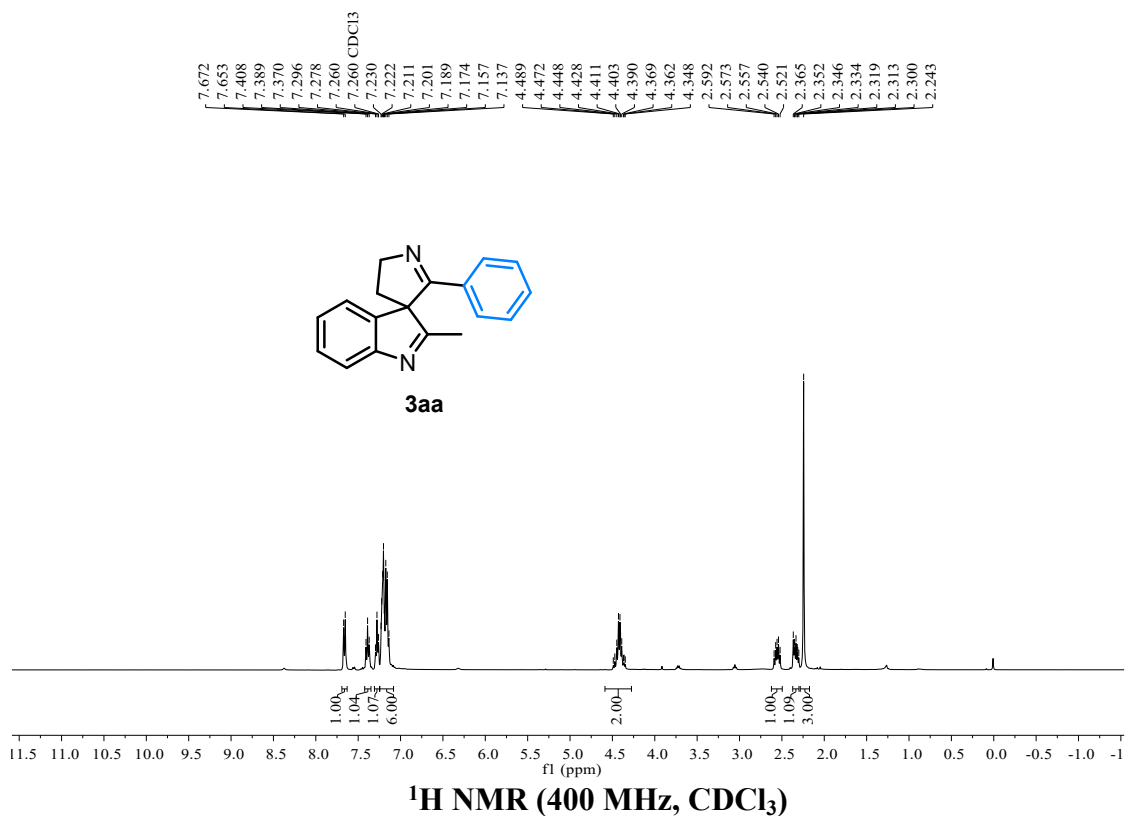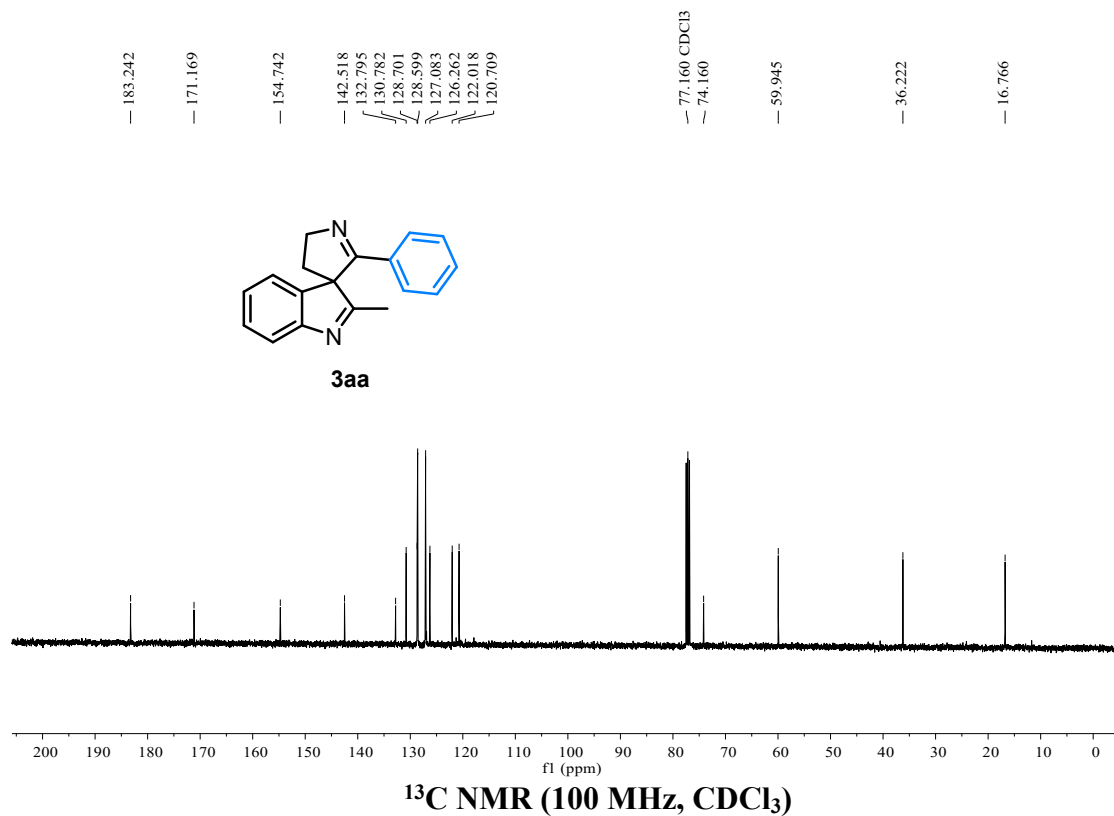

7.469  
7.448  
7.201  
7.185  
7.162  
7.141  
7.090  
7.071  
7.051  
6.810  
6.674  
6.674  
4.375  
4.358  
4.335  
4.315  
4.294  
4.271  
4.246  
4.231  
3.649  
2.490  
2.471  
2.455  
2.438  
2.419  
2.250  
2.234  
2.216  
2.199  
2.183  
2.101  
-0.000 TMS

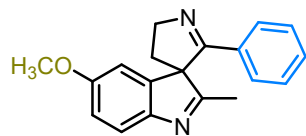

**3ba**

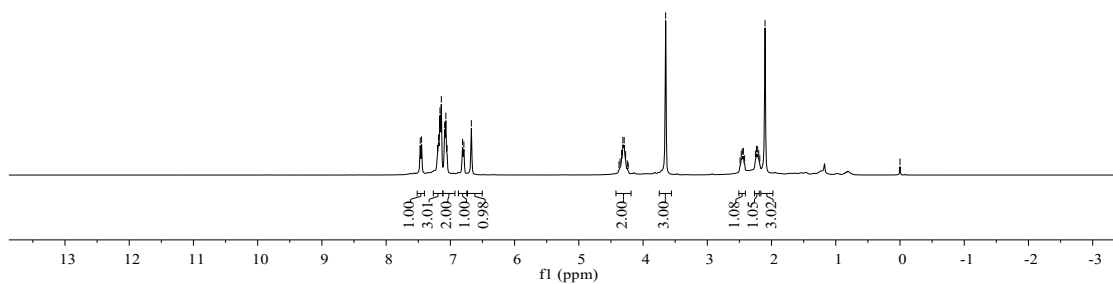

**<sup>1</sup>H NMR (400 MHz, CDCl<sub>3</sub>)**

180.875  
171.193  
158.586  
148.306  
144.062  
132.734  
130.730  
128.556  
127.099  
120.945  
113.417  
108.396  
77.160 CDCl<sub>3</sub>  
74.236  
59.836  
55.659  
36.357  
16.546

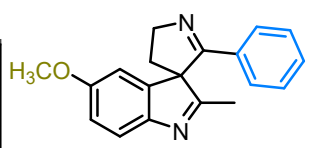

**3ba**

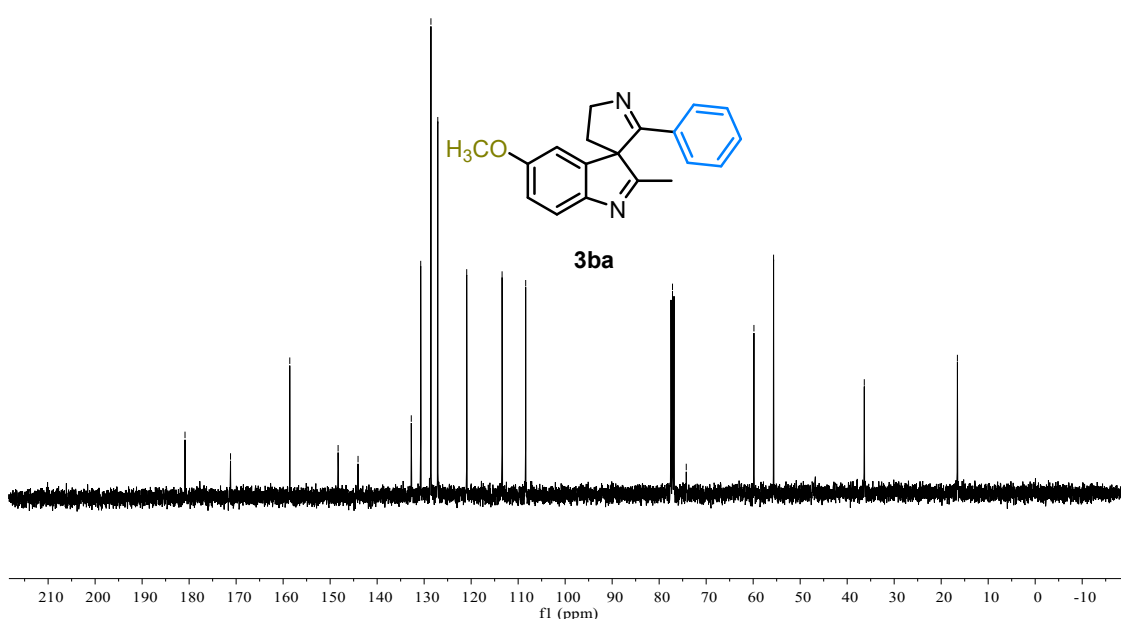

**<sup>13</sup>C NMR (100 MHz, CDCl<sub>3</sub>)**

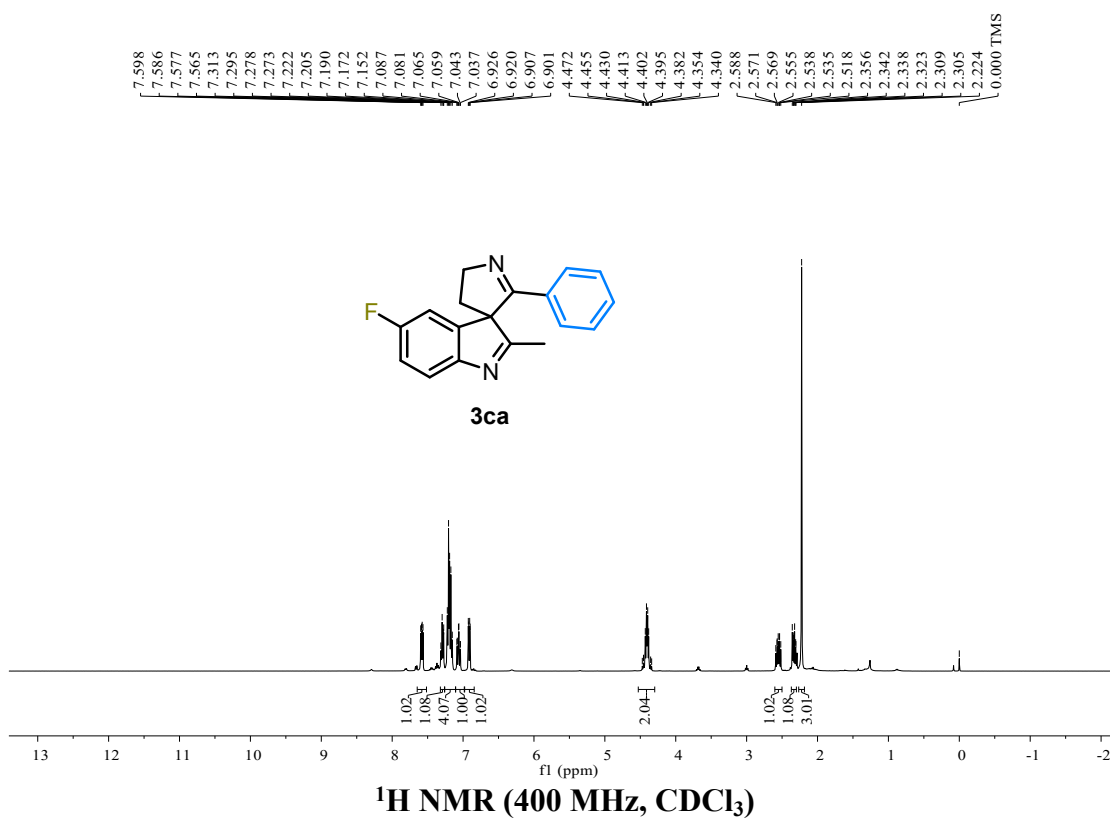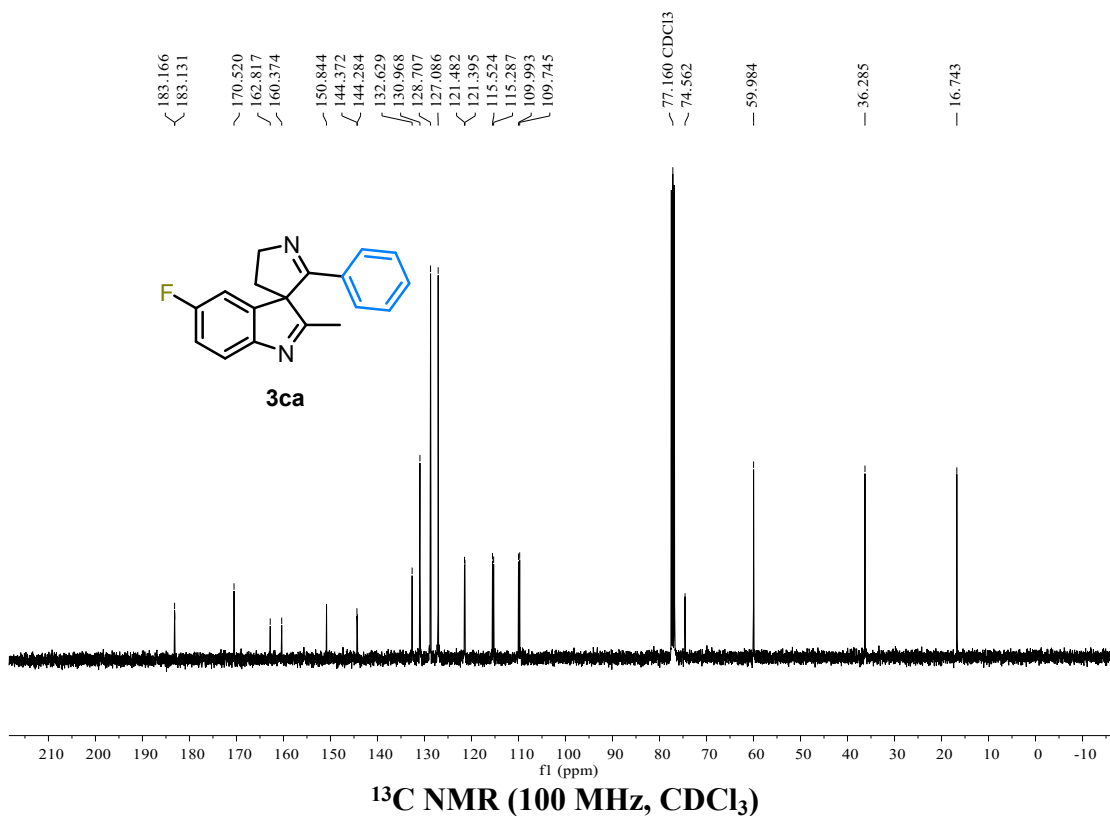

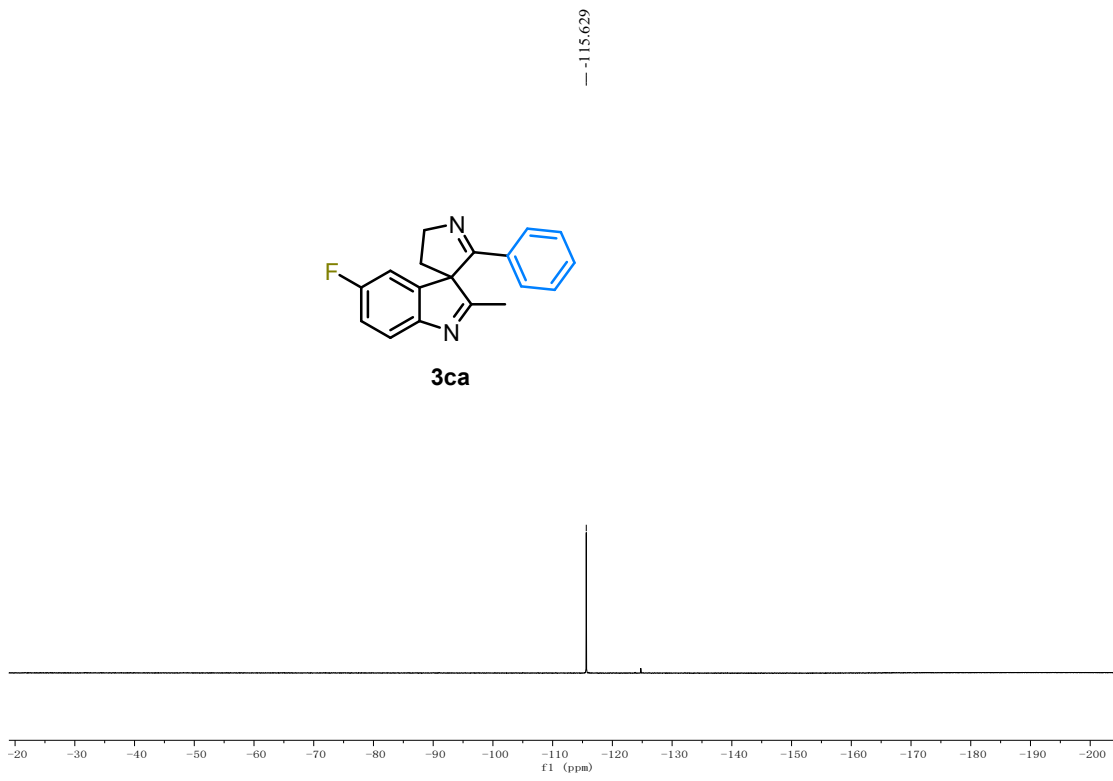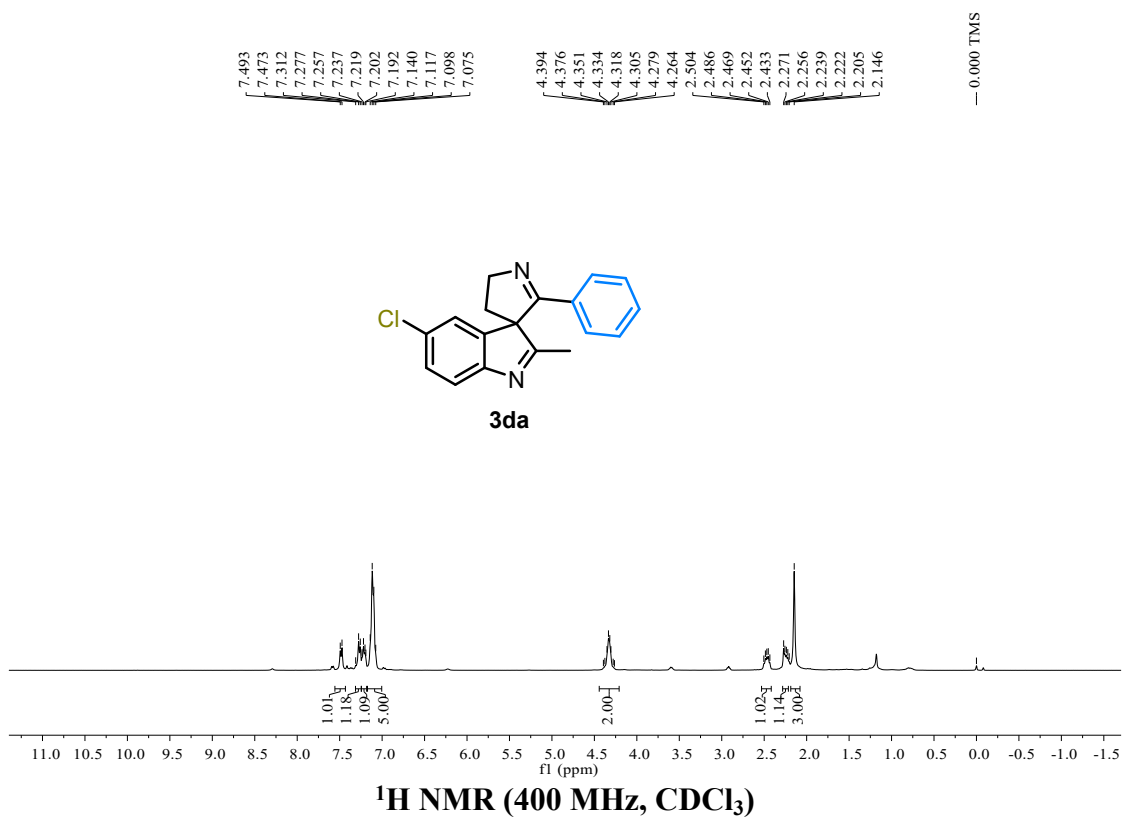

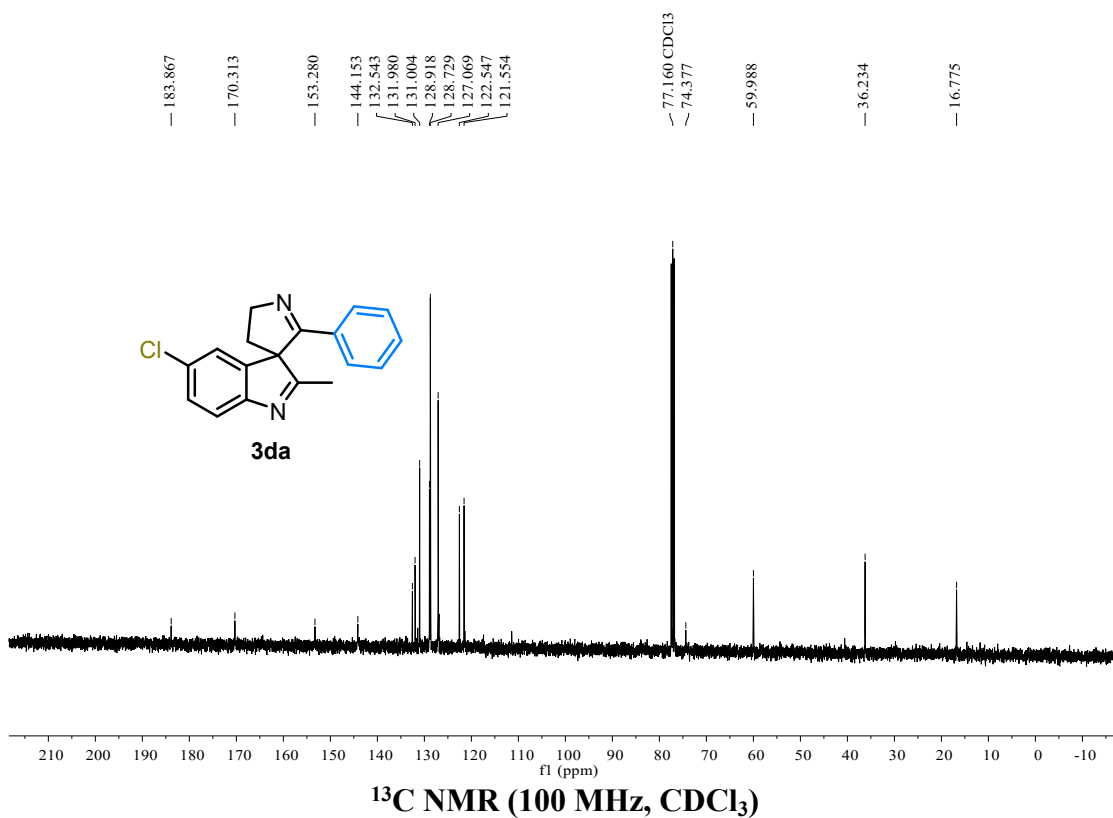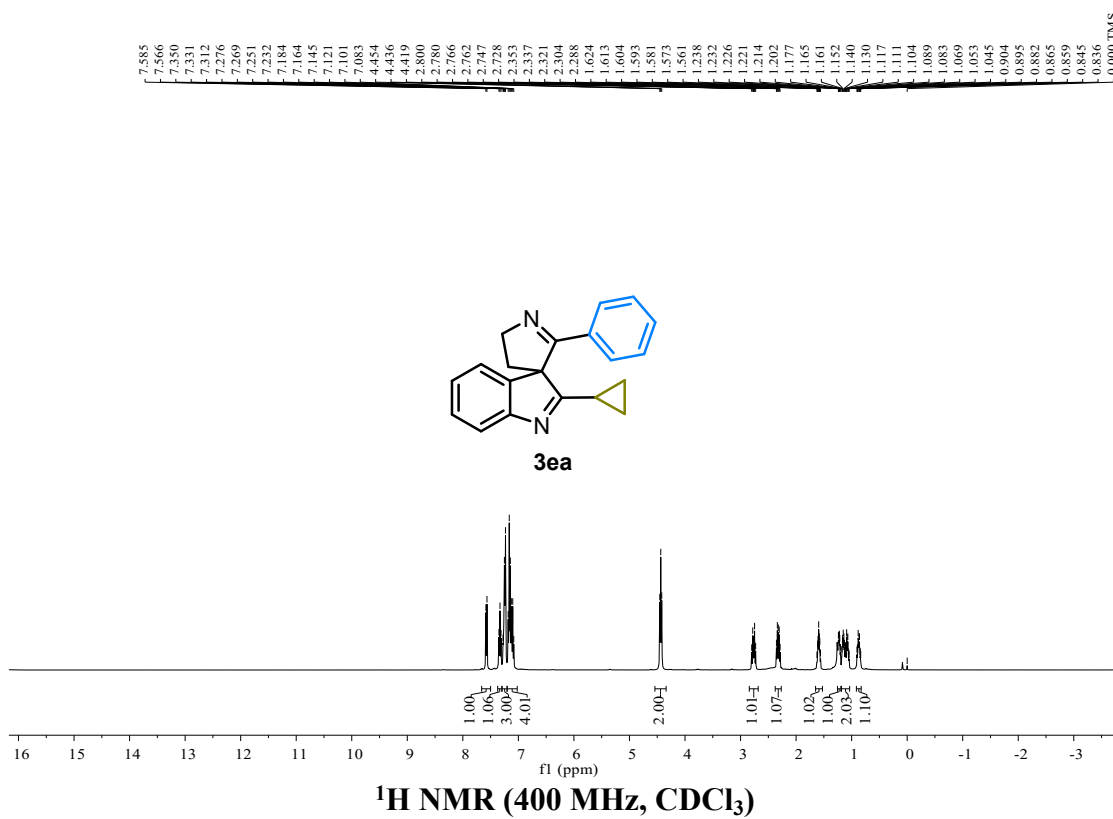

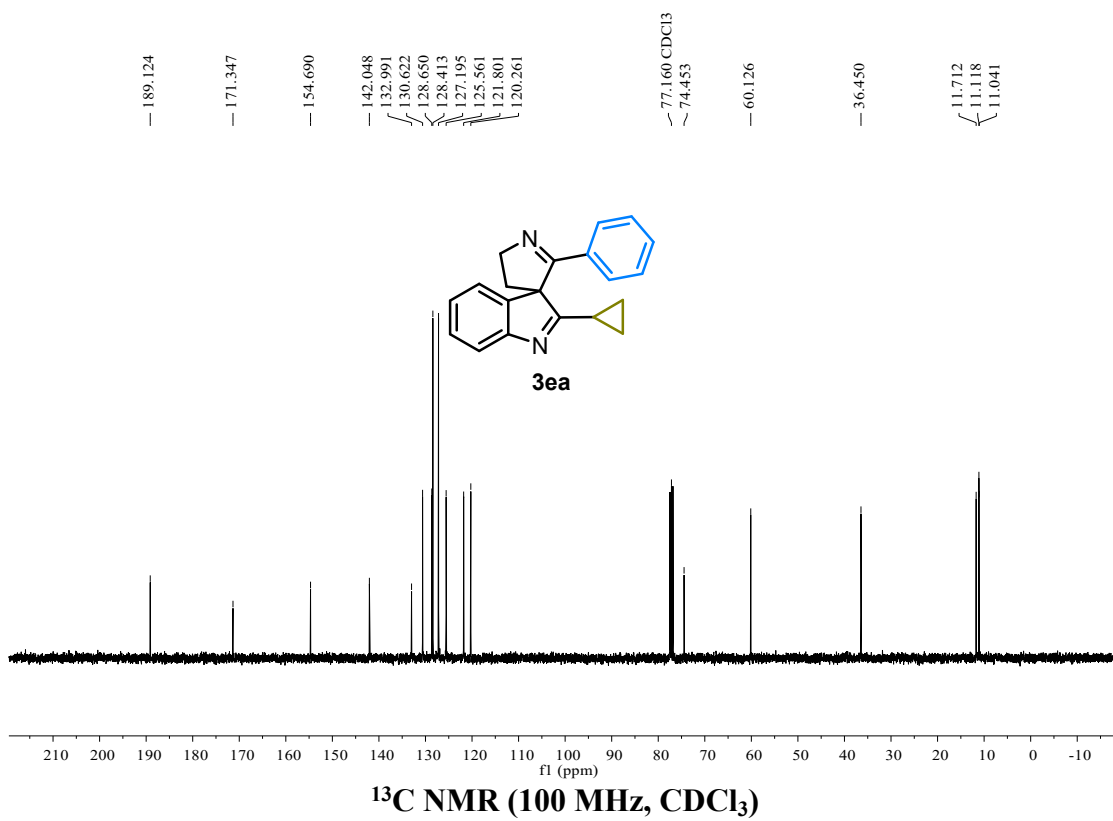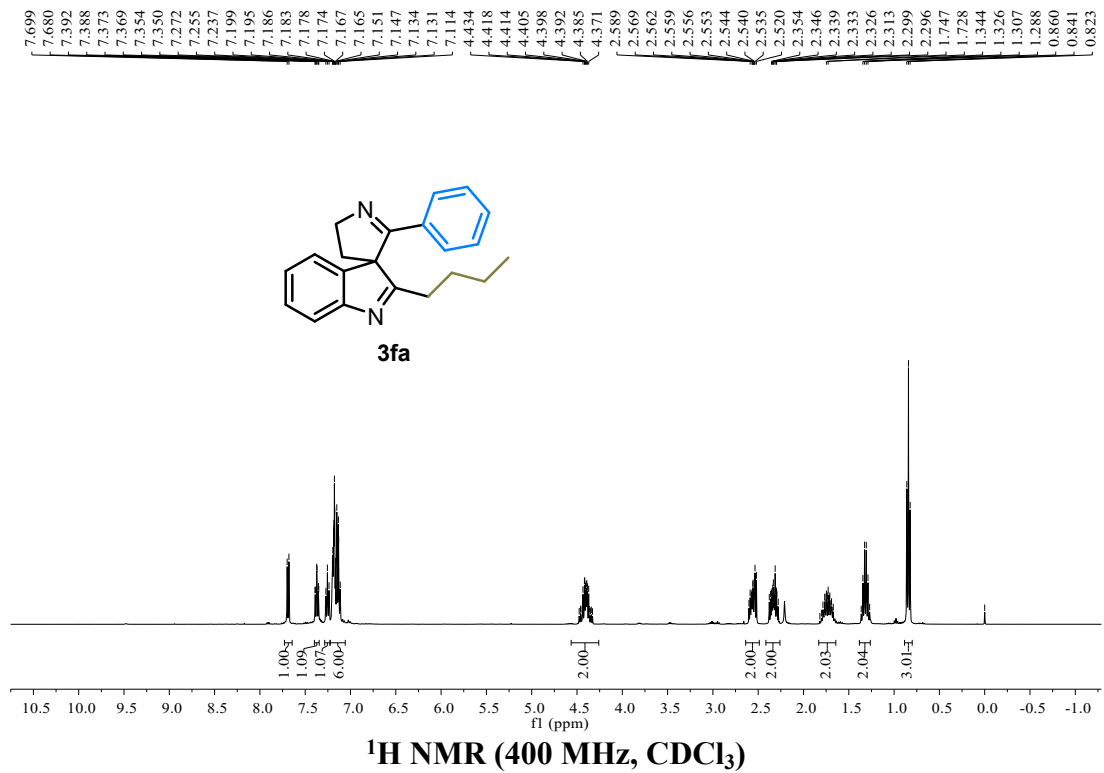



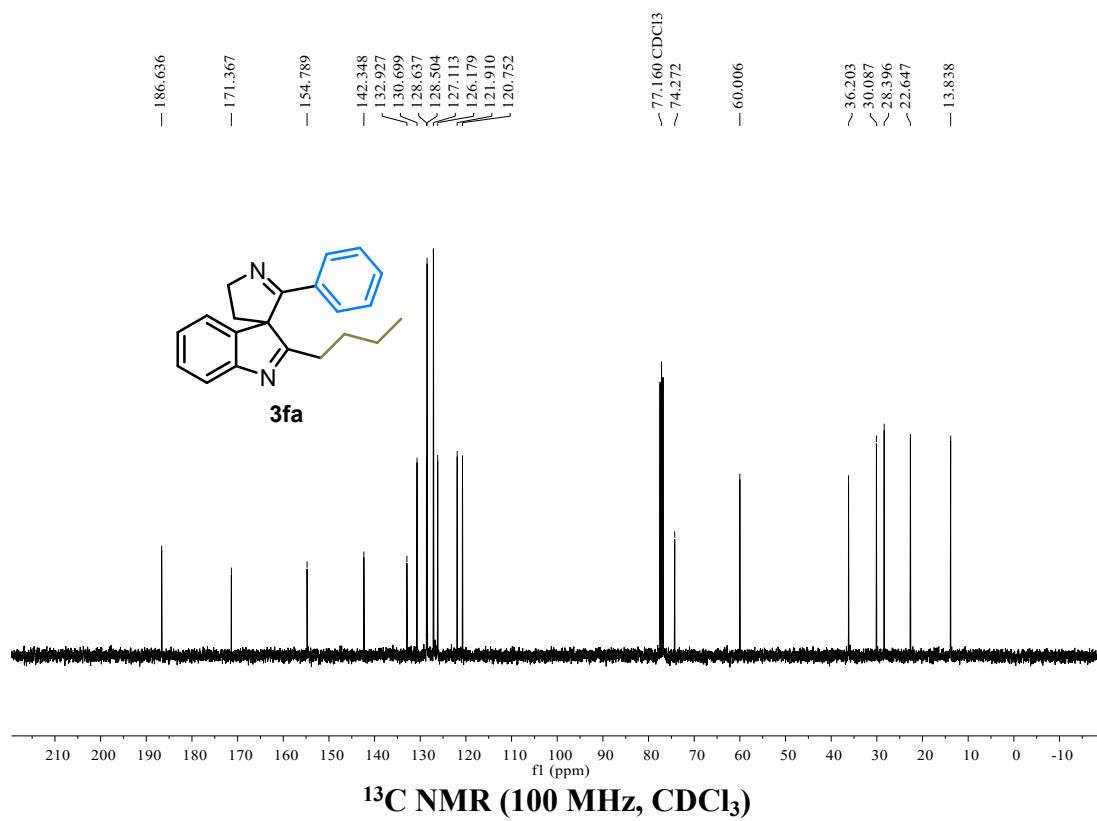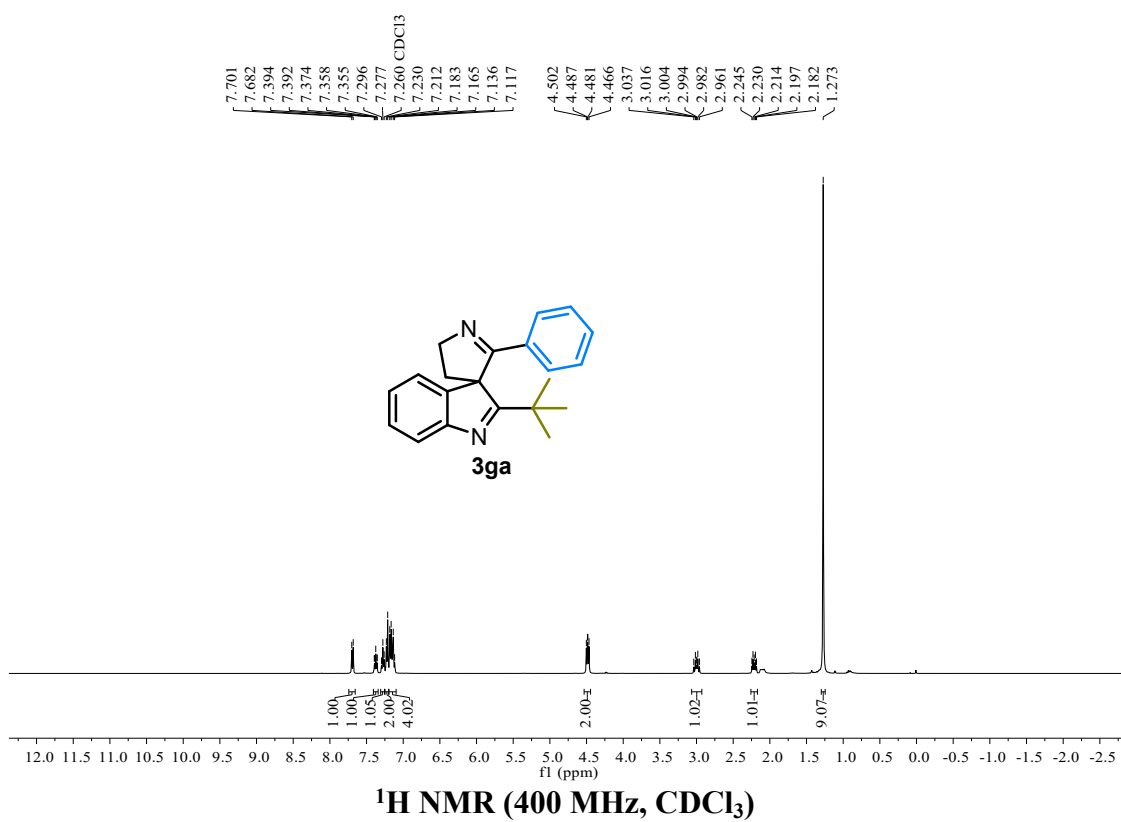

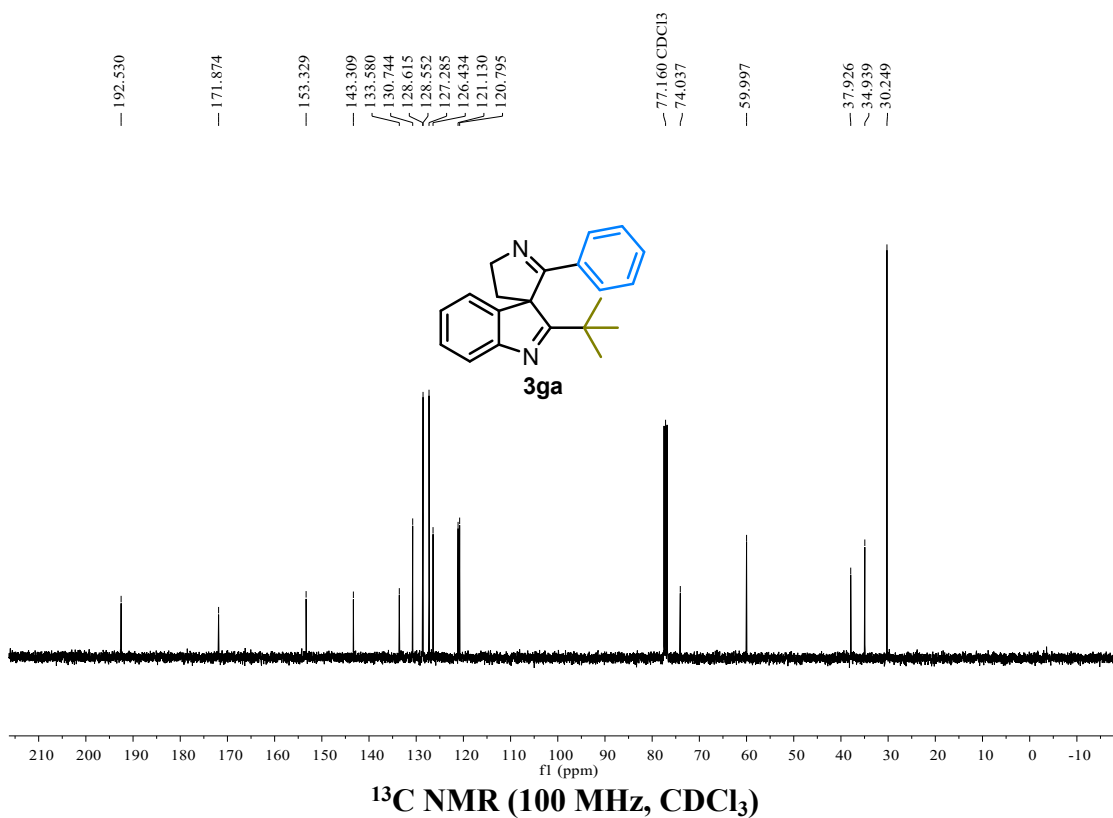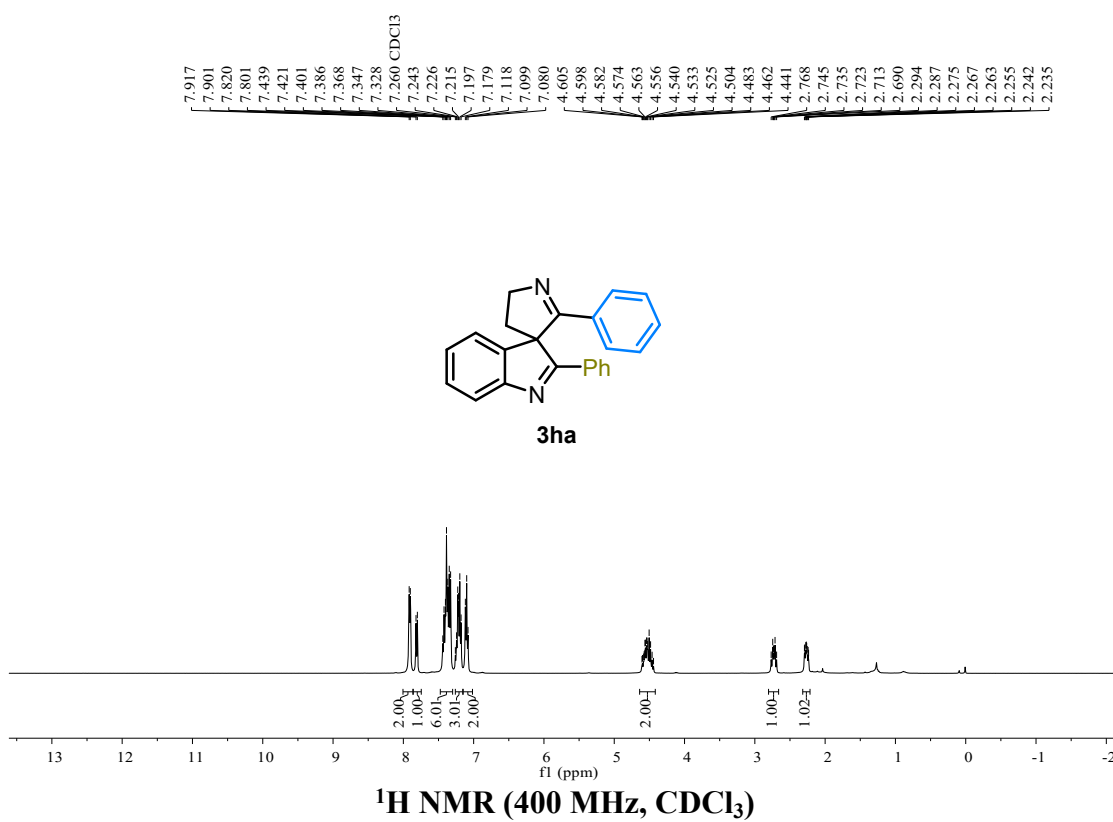

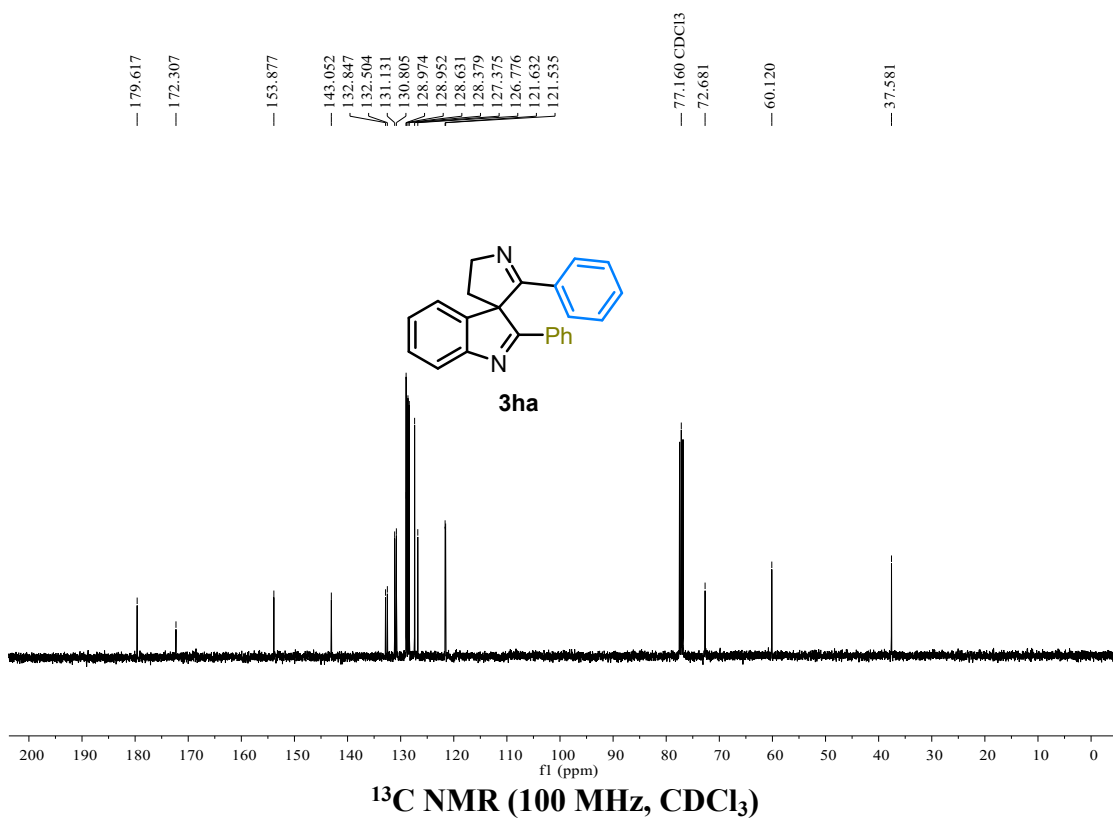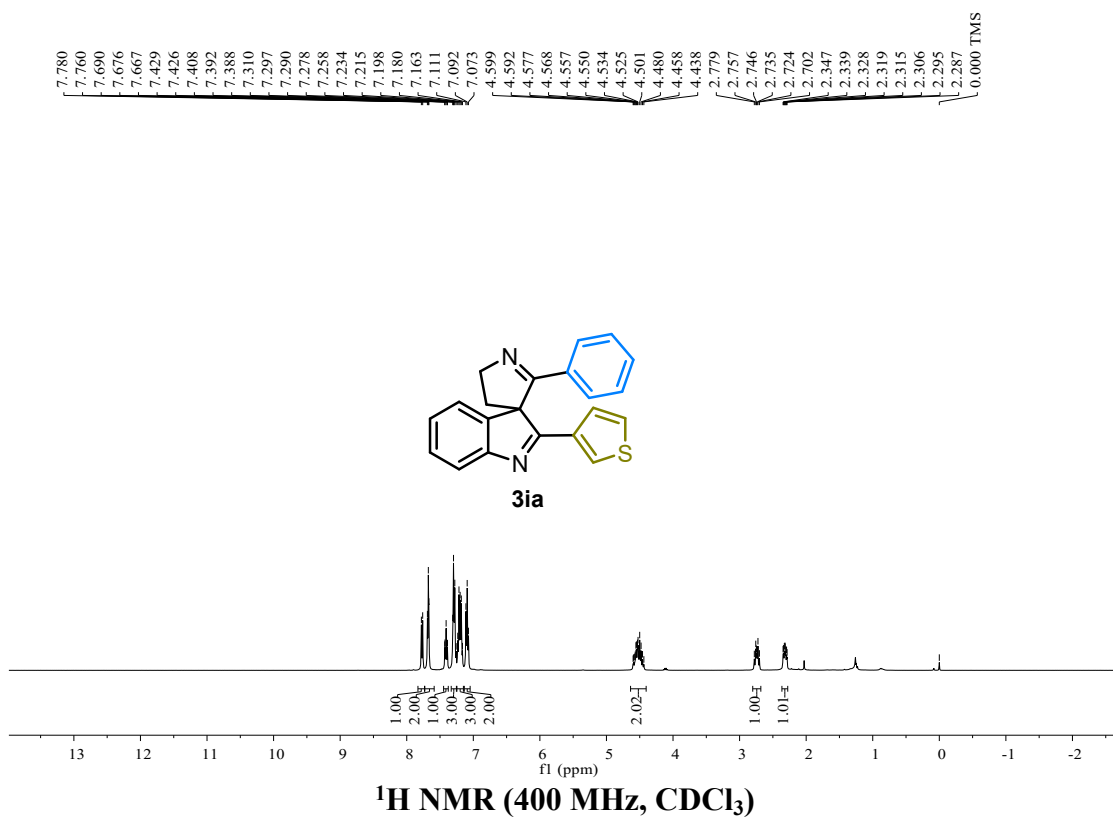

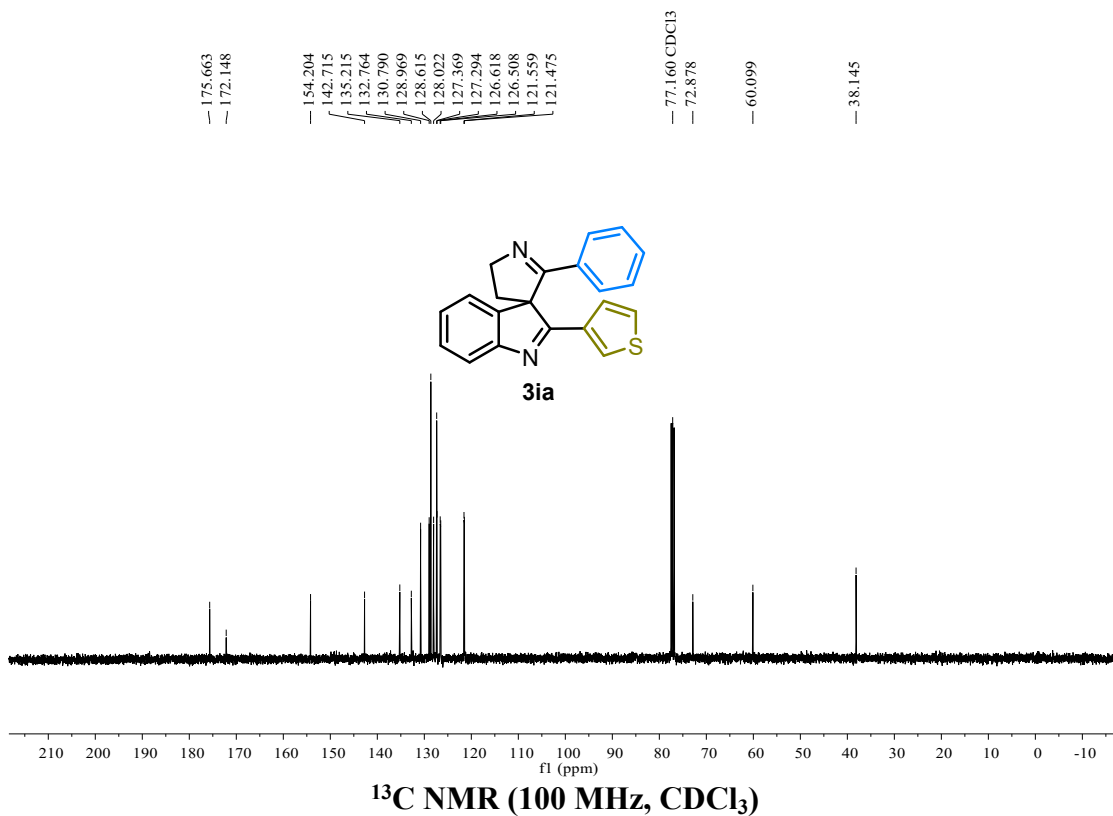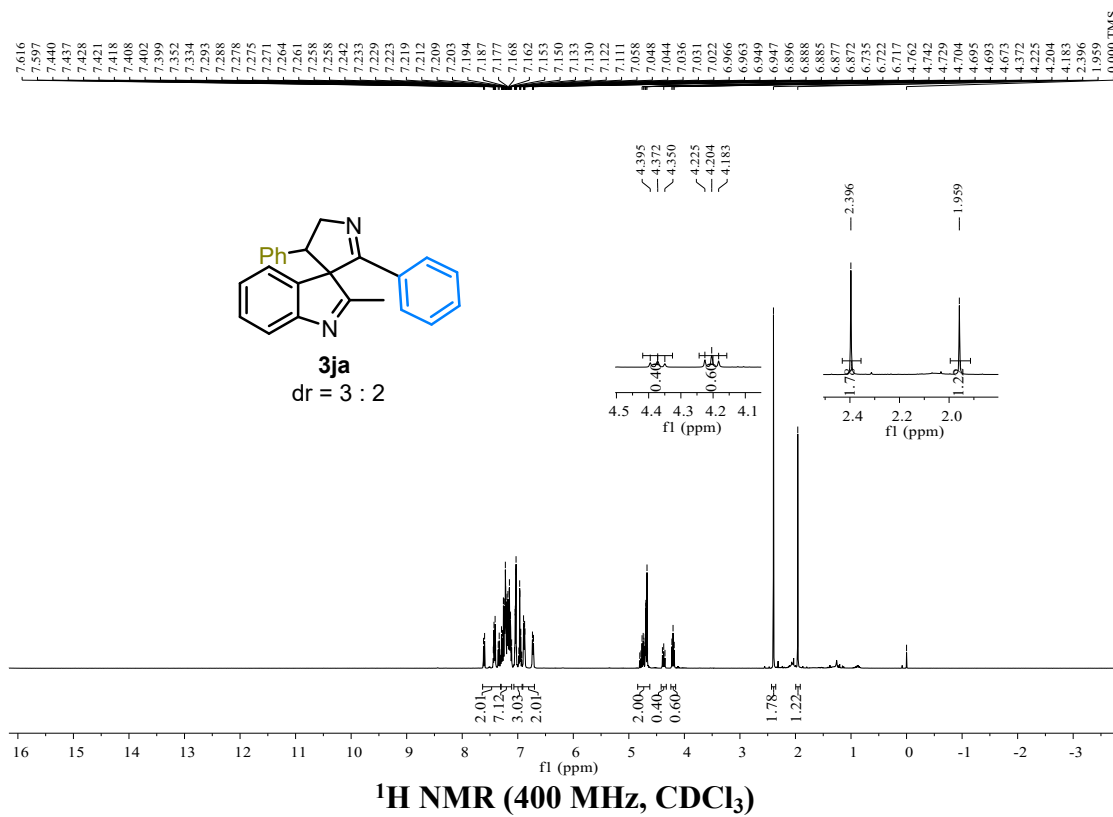

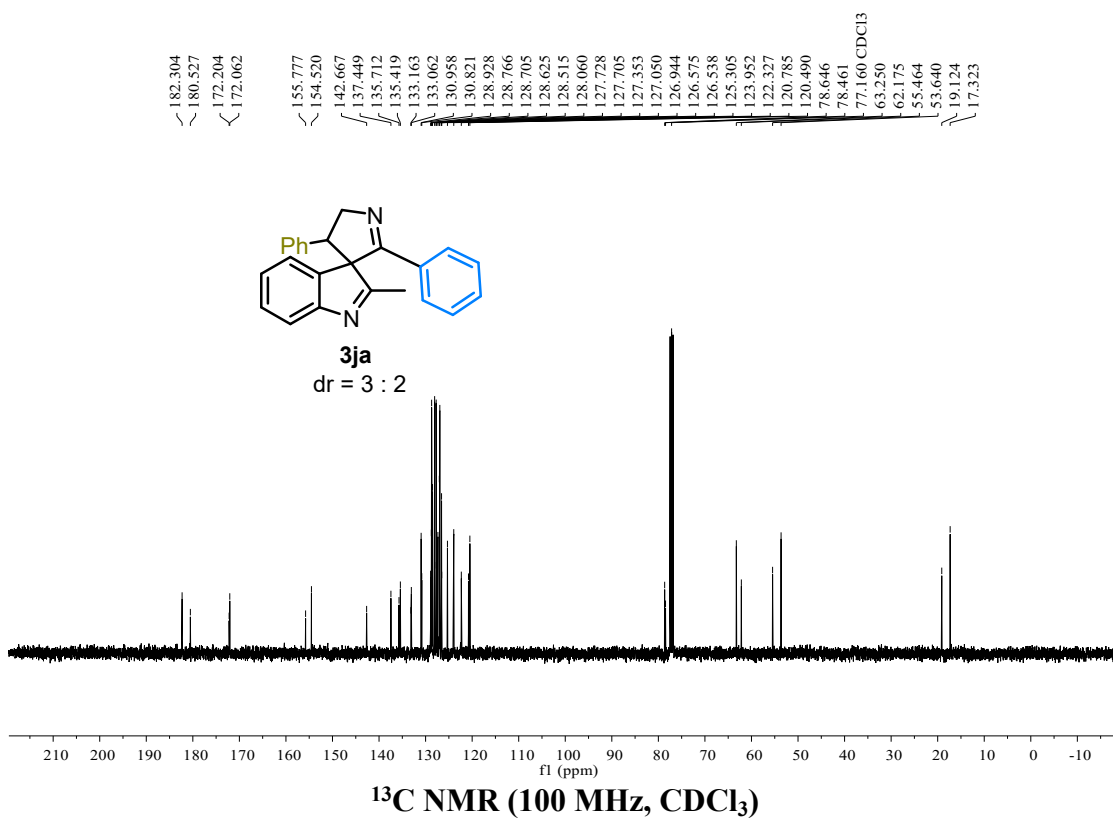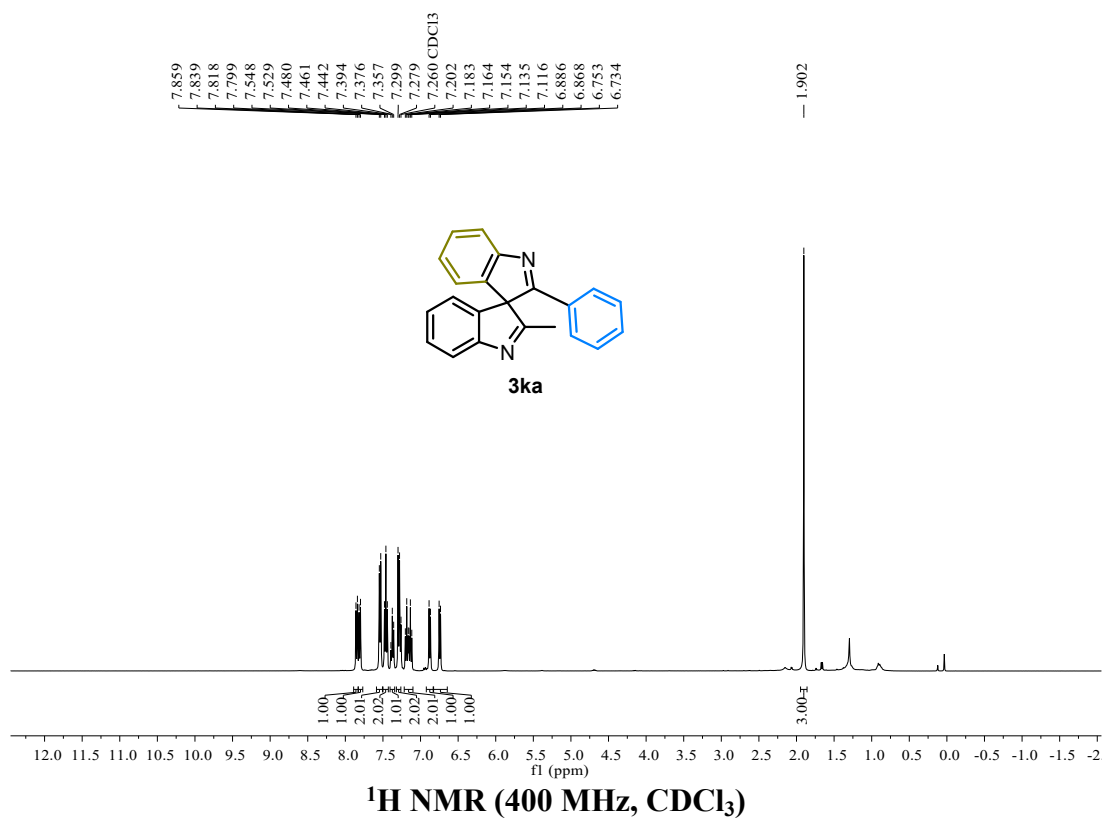

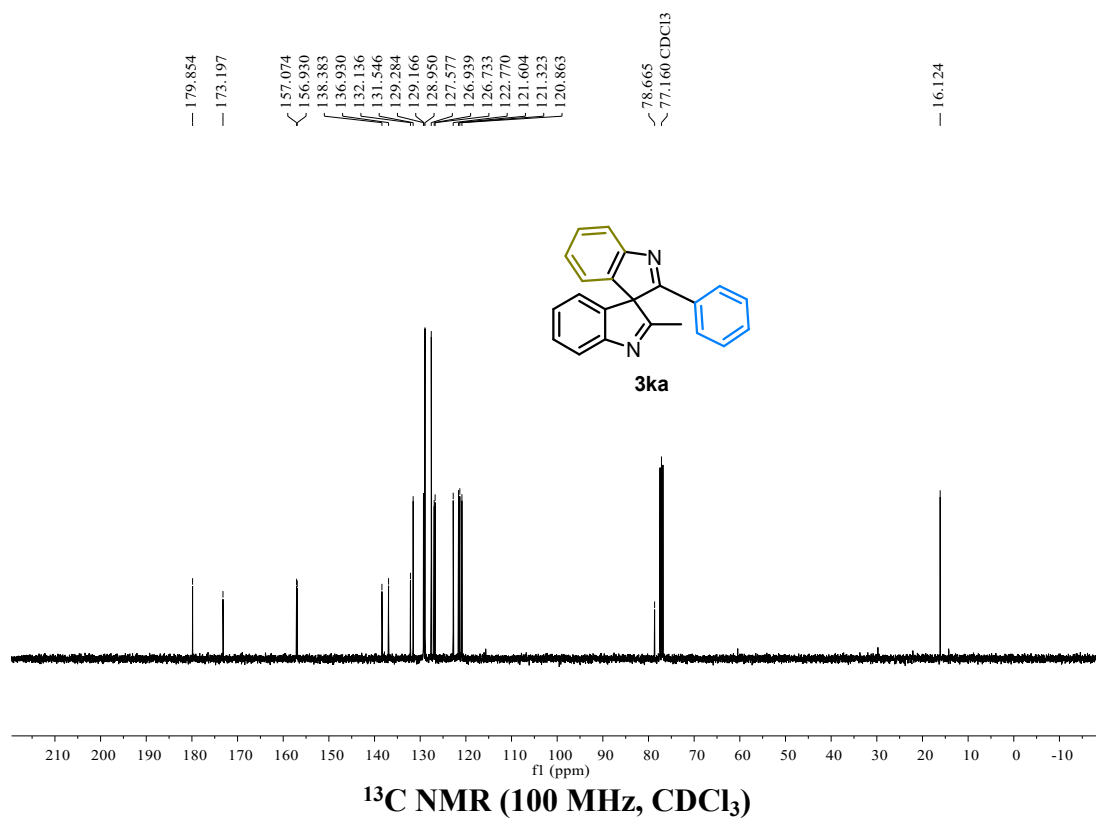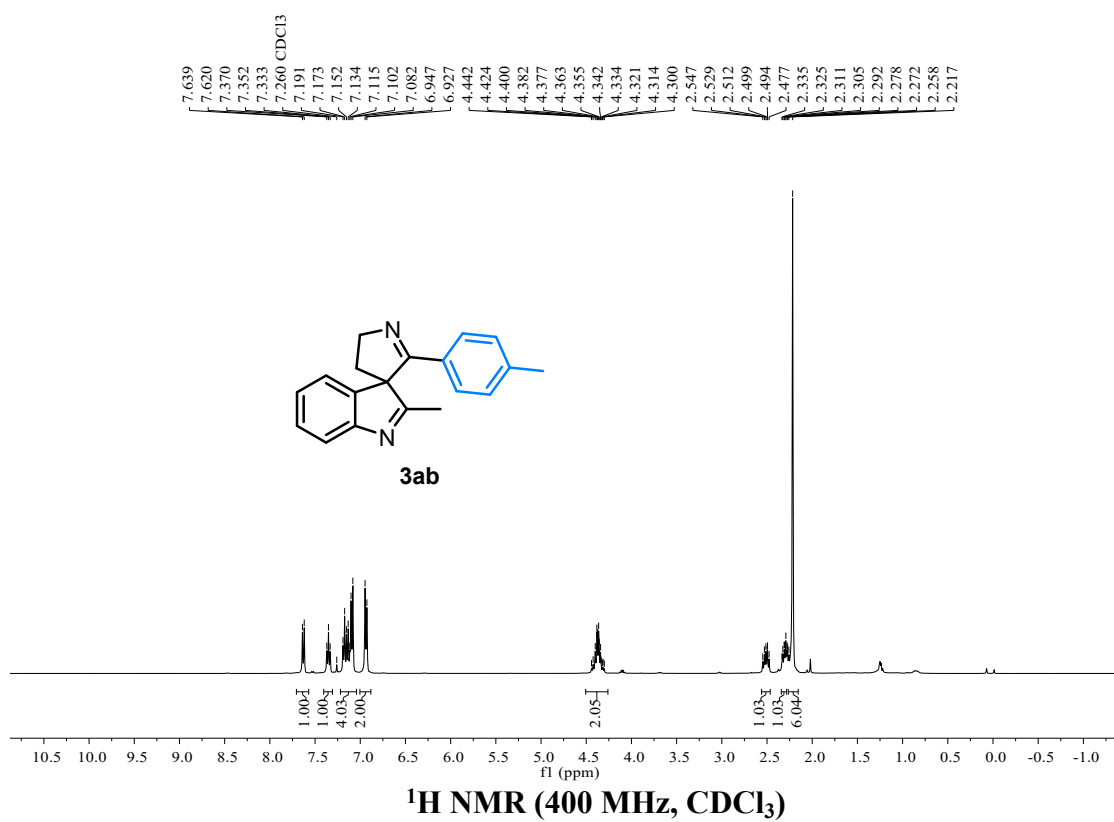

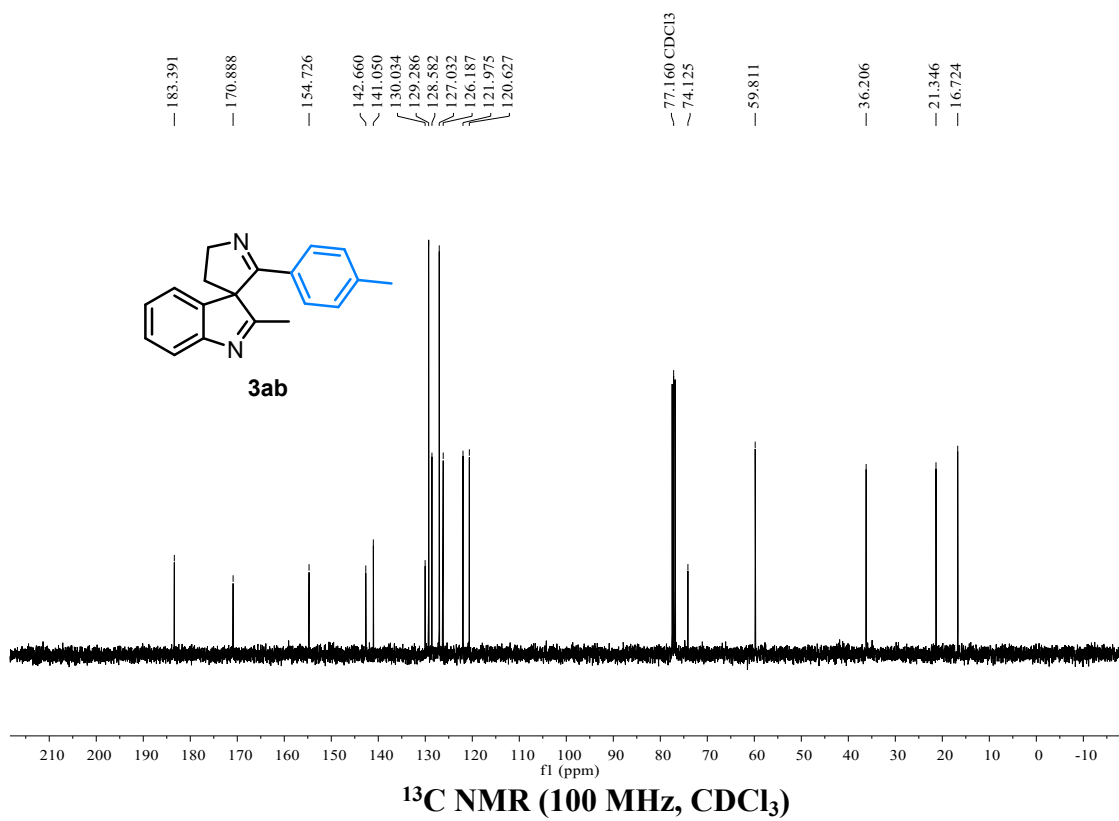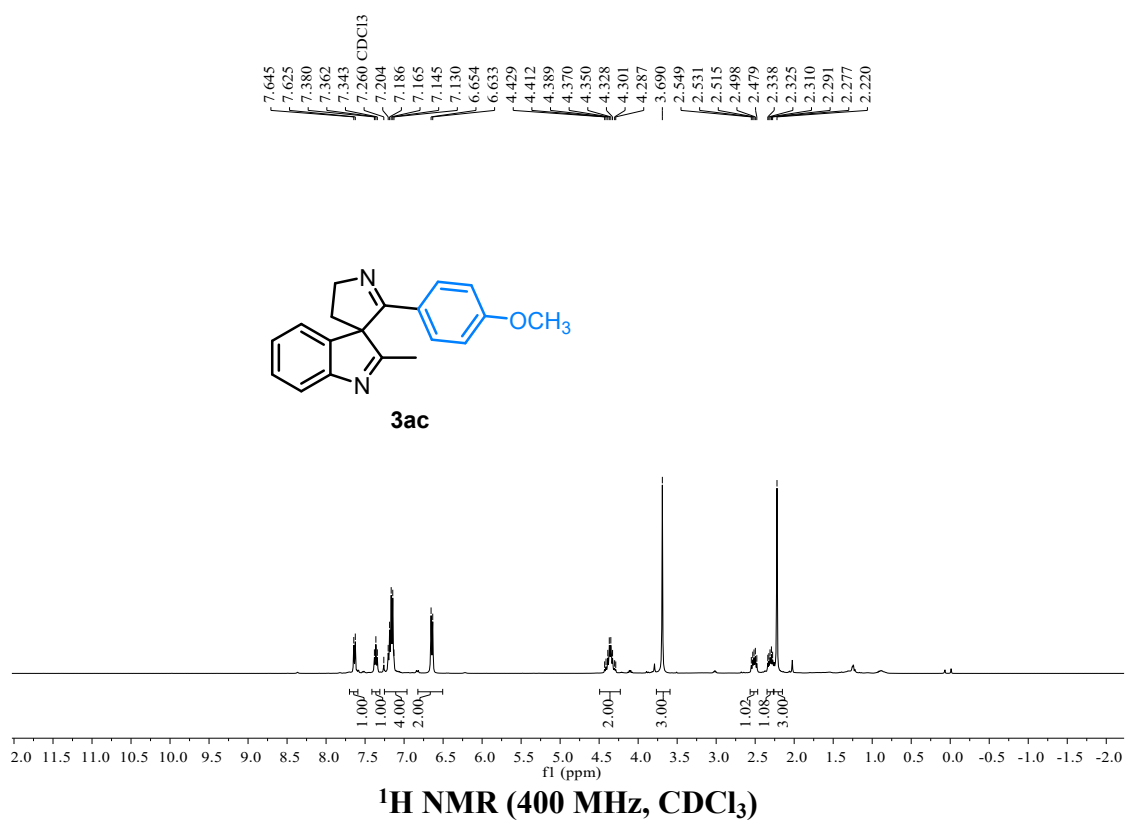

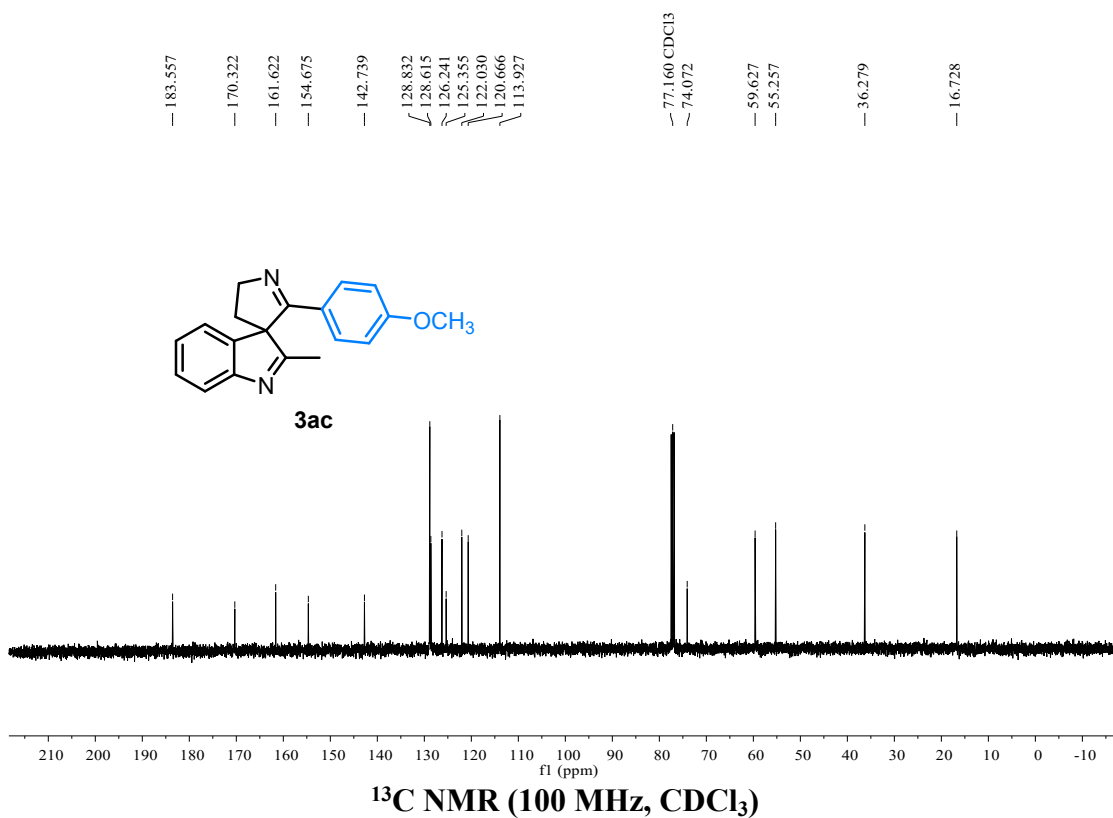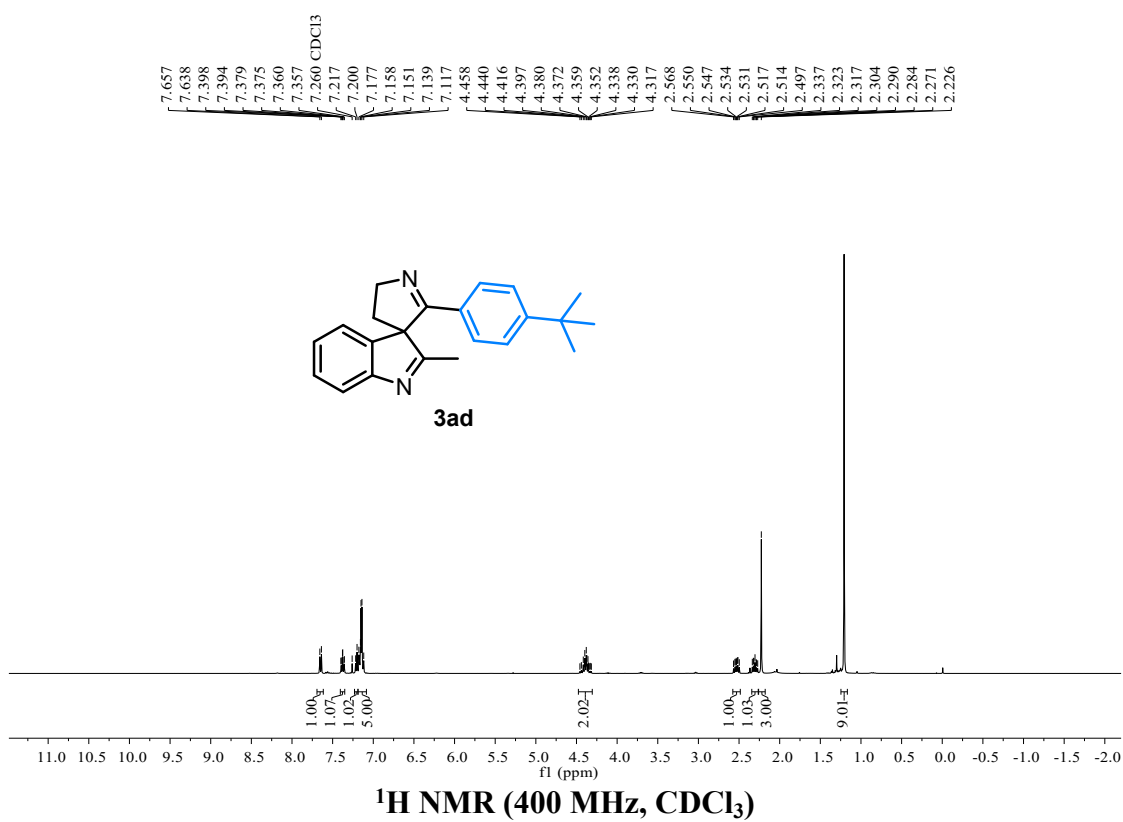



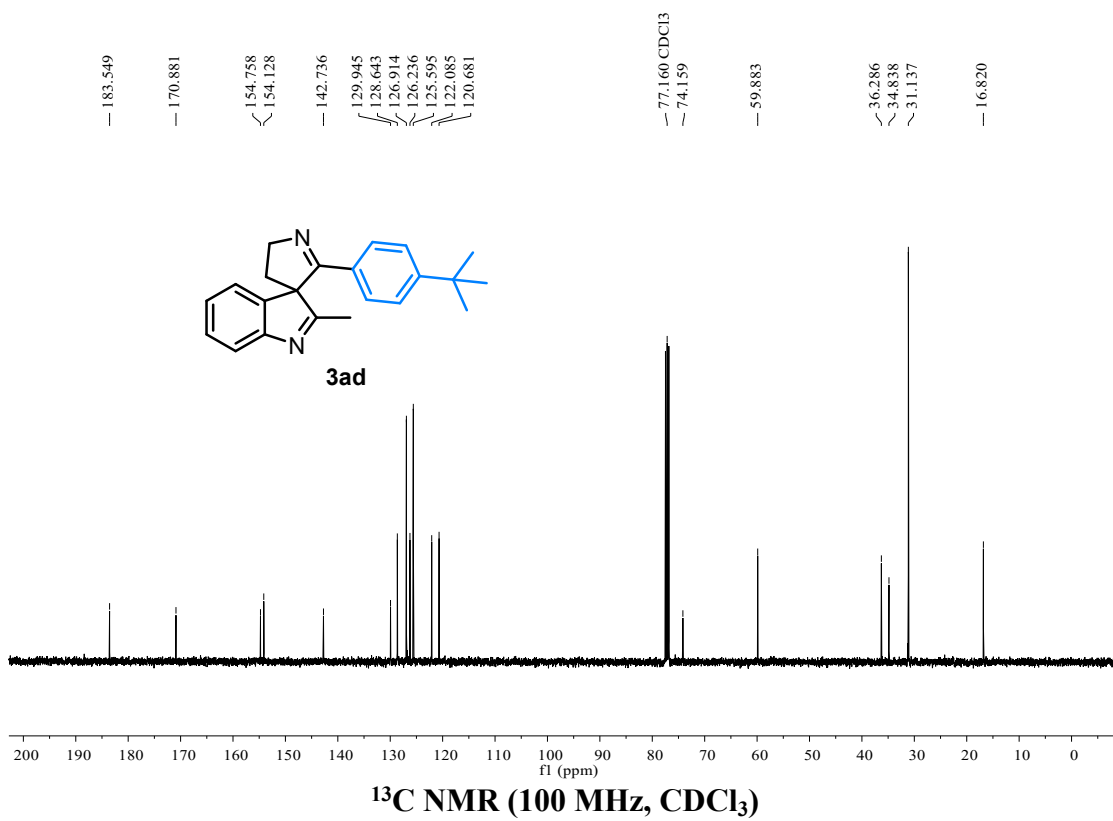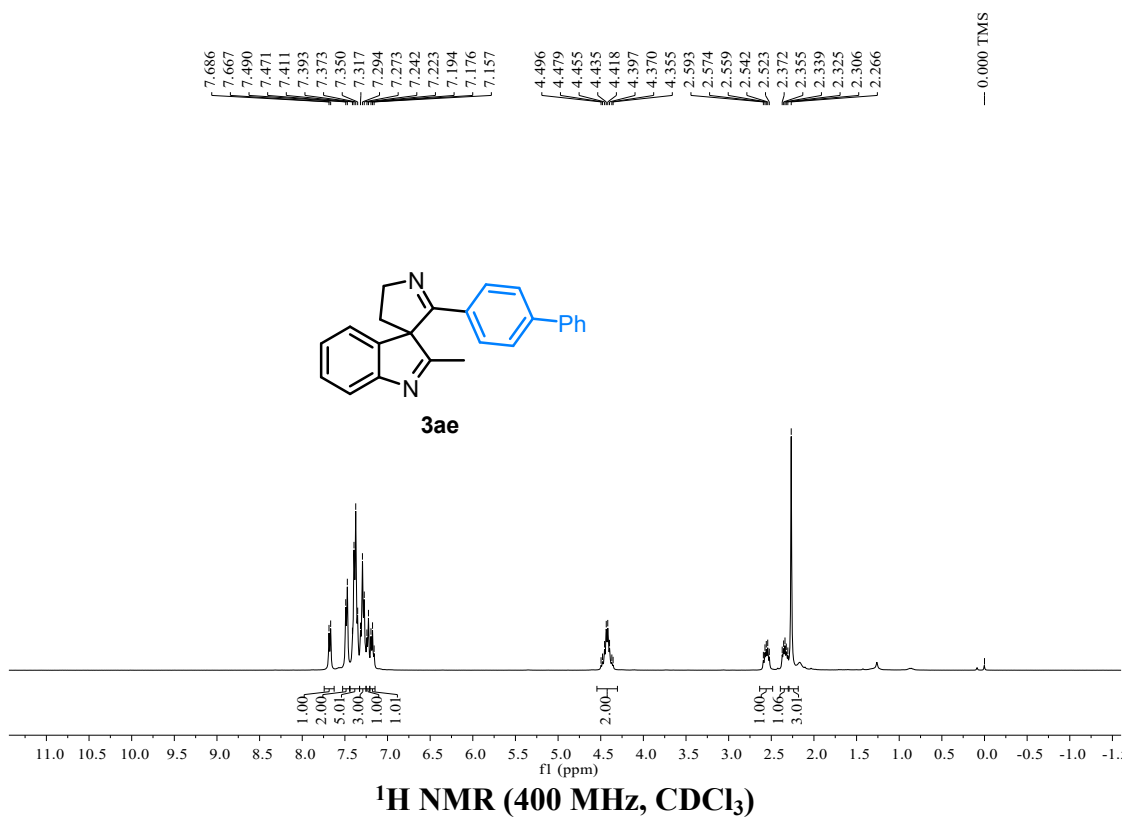

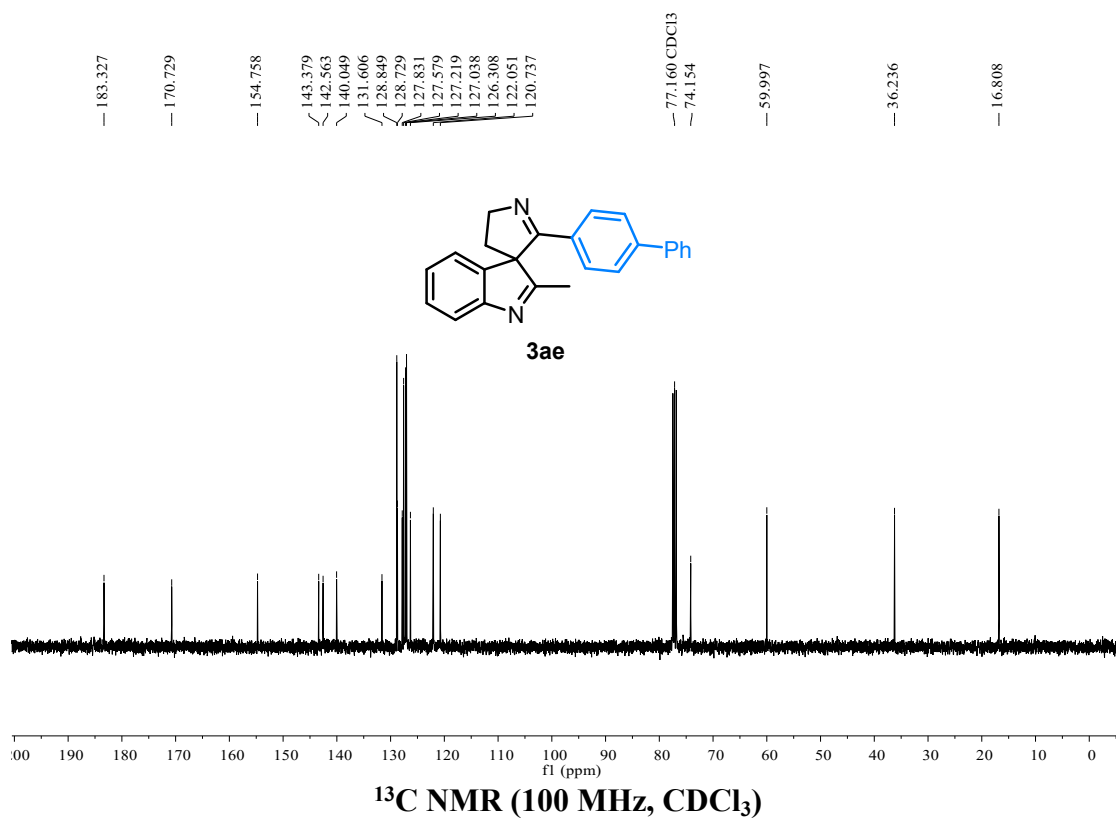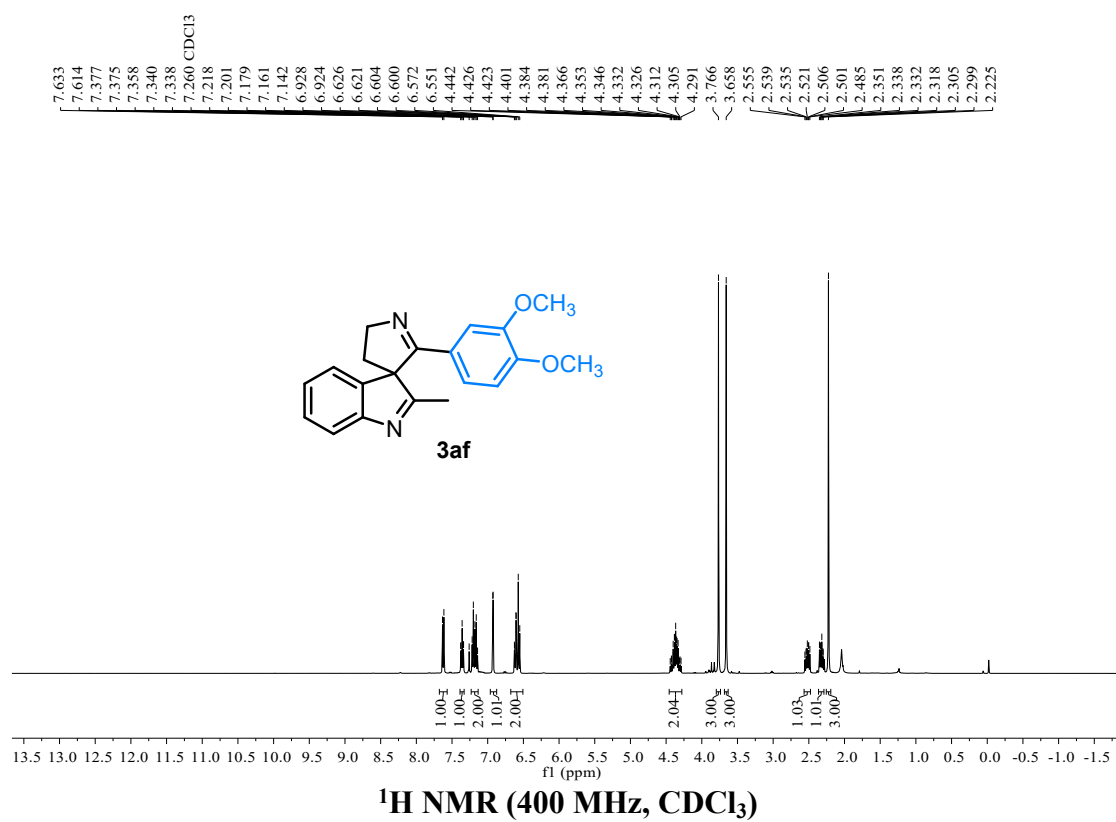

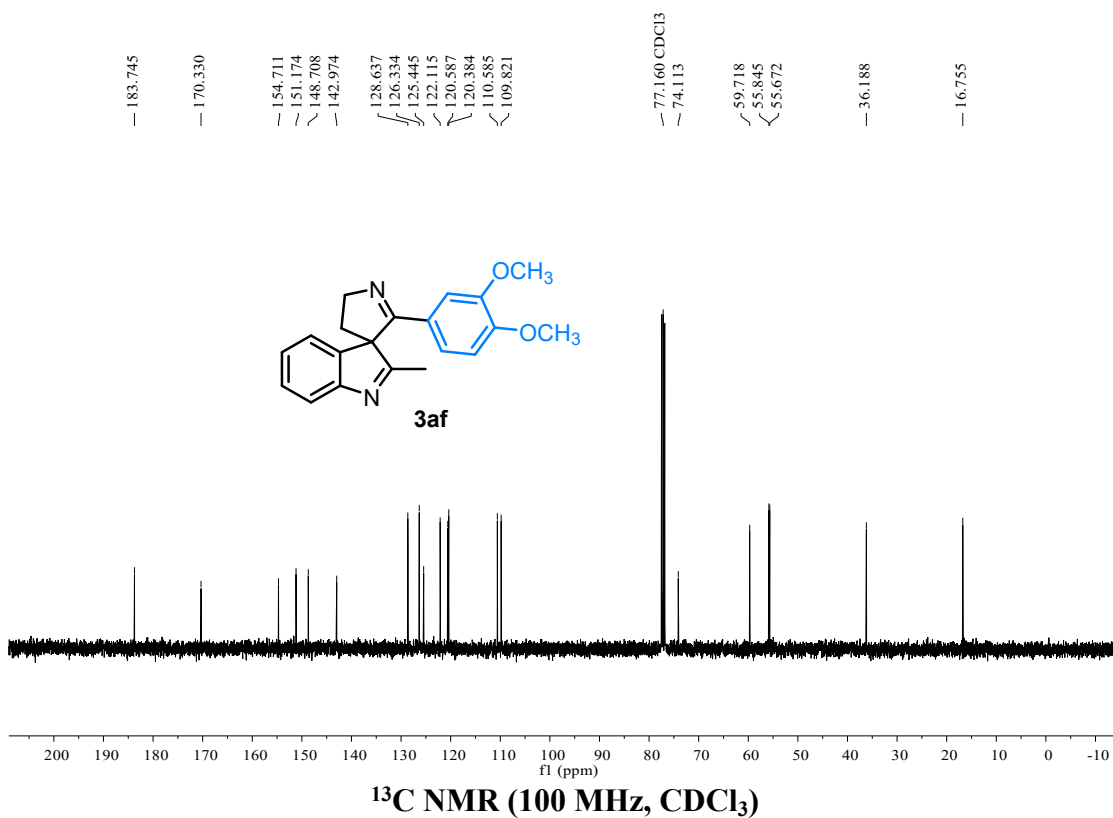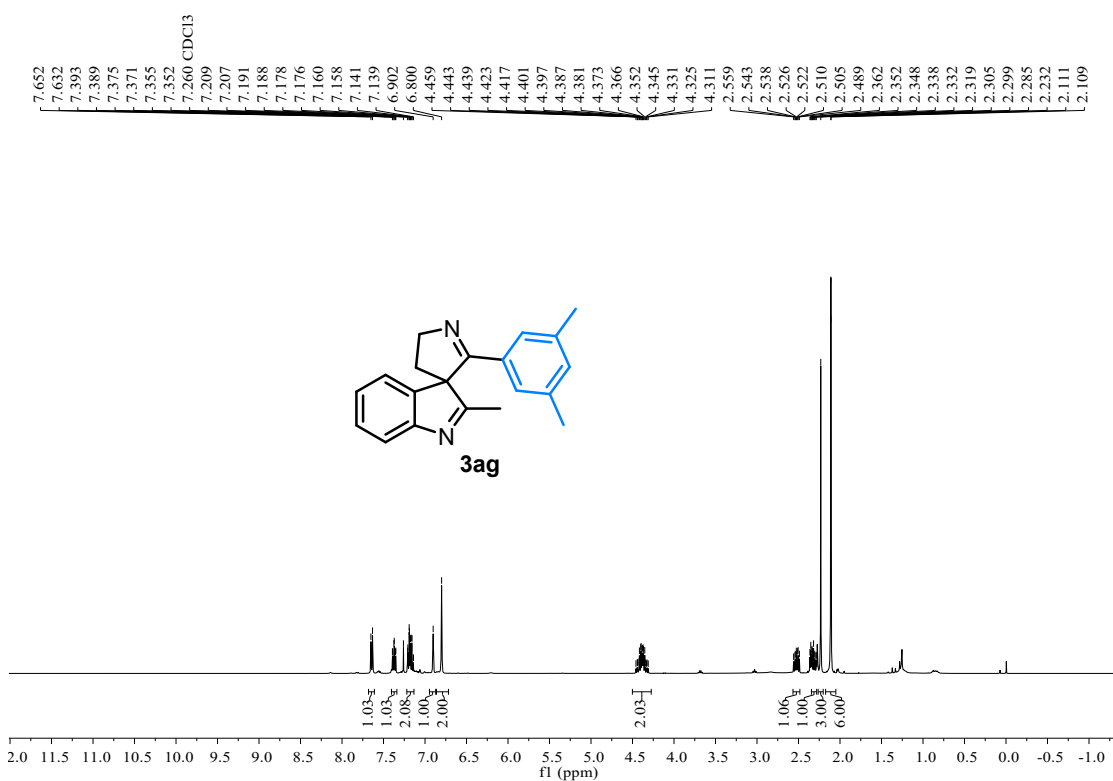

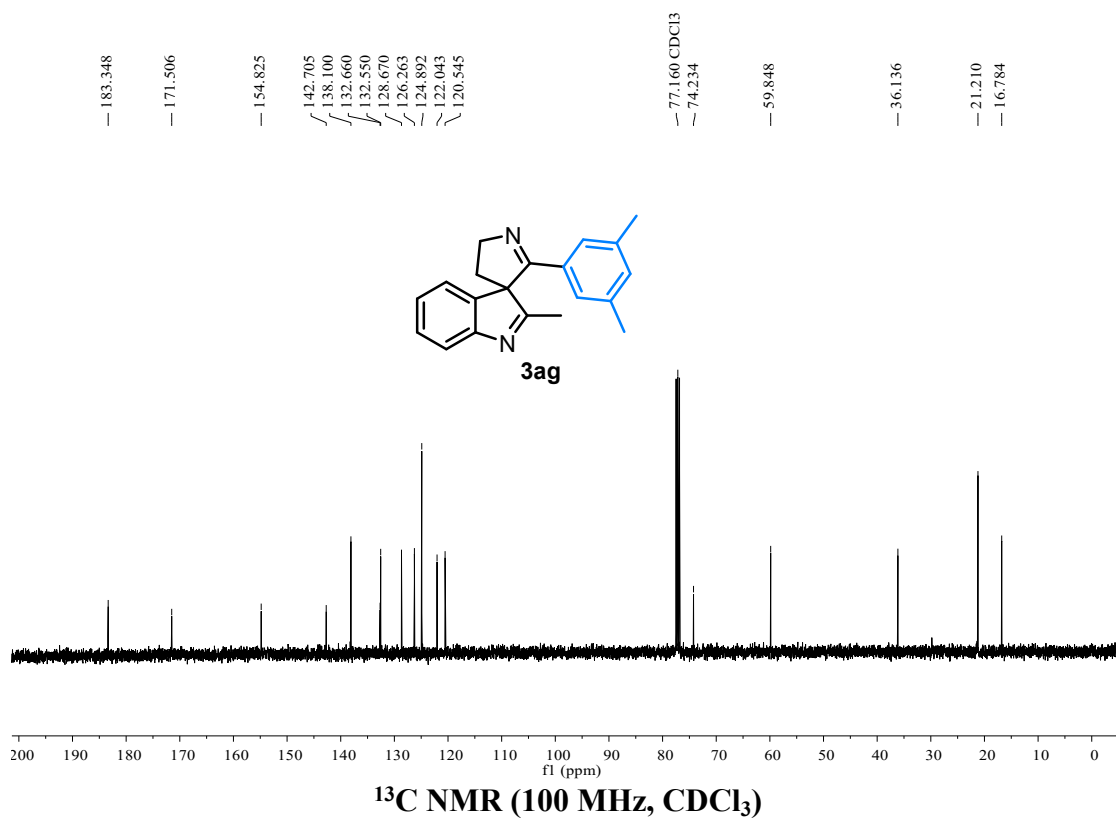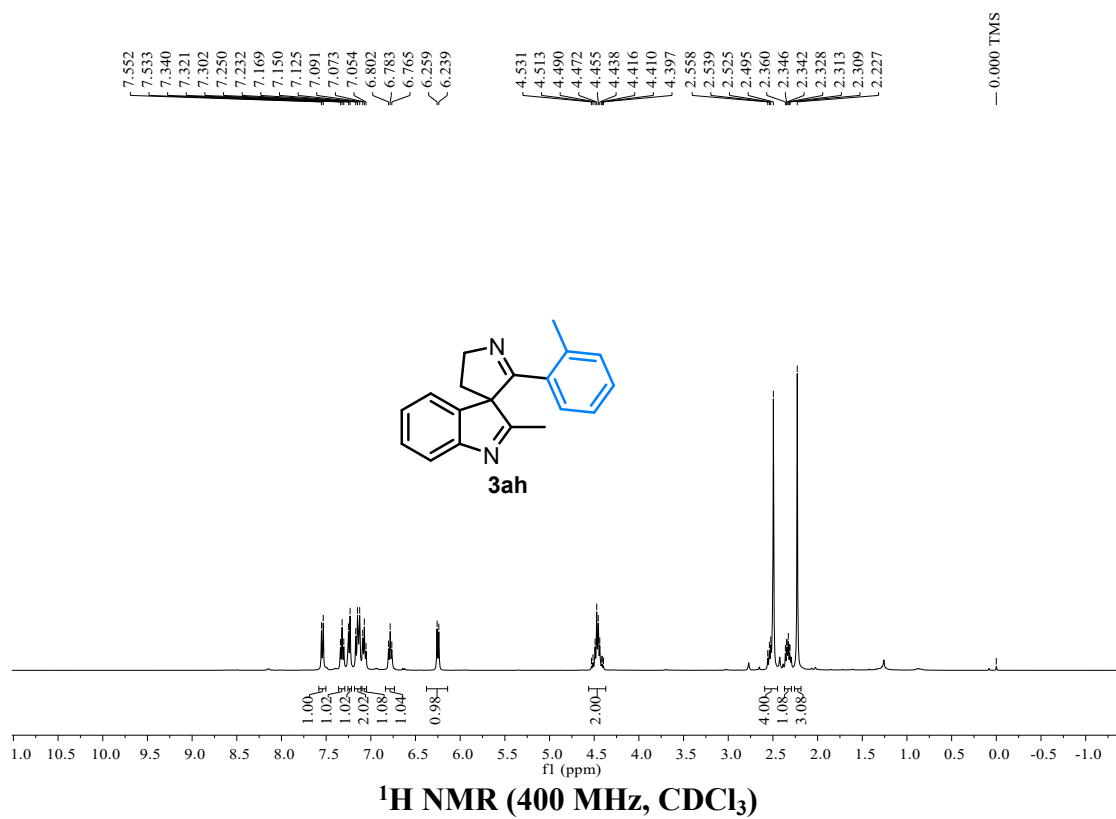

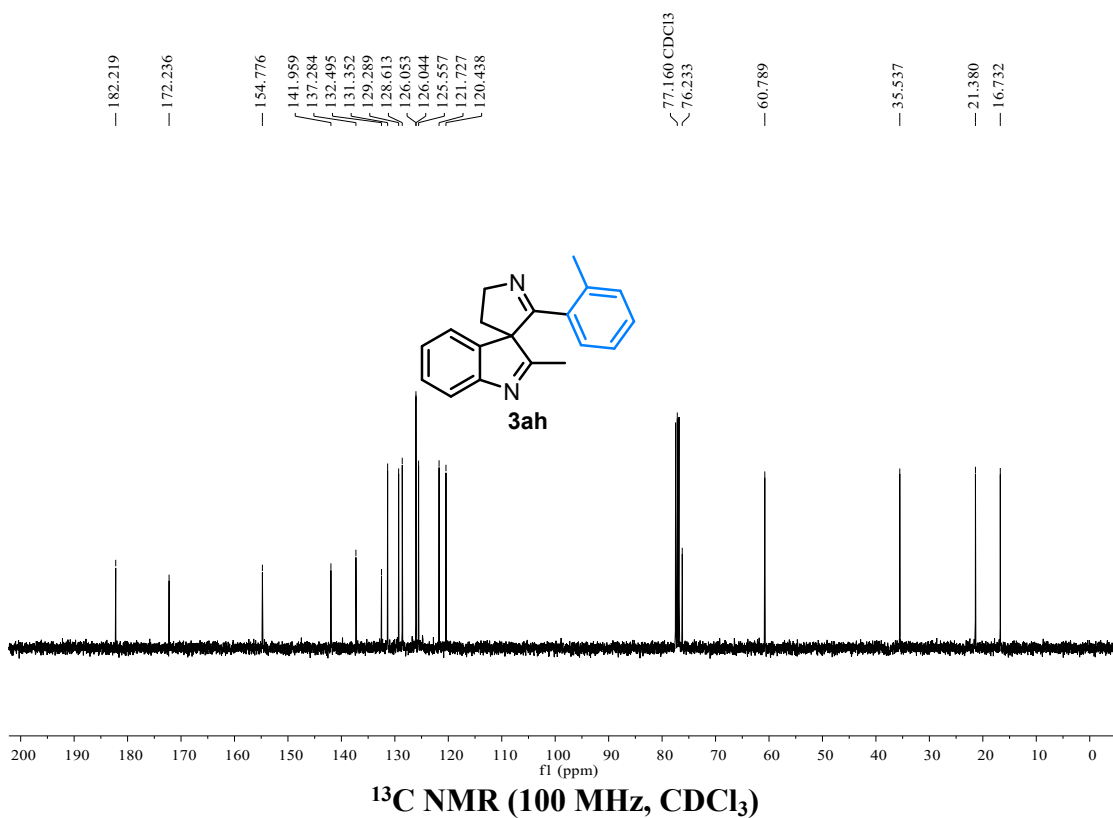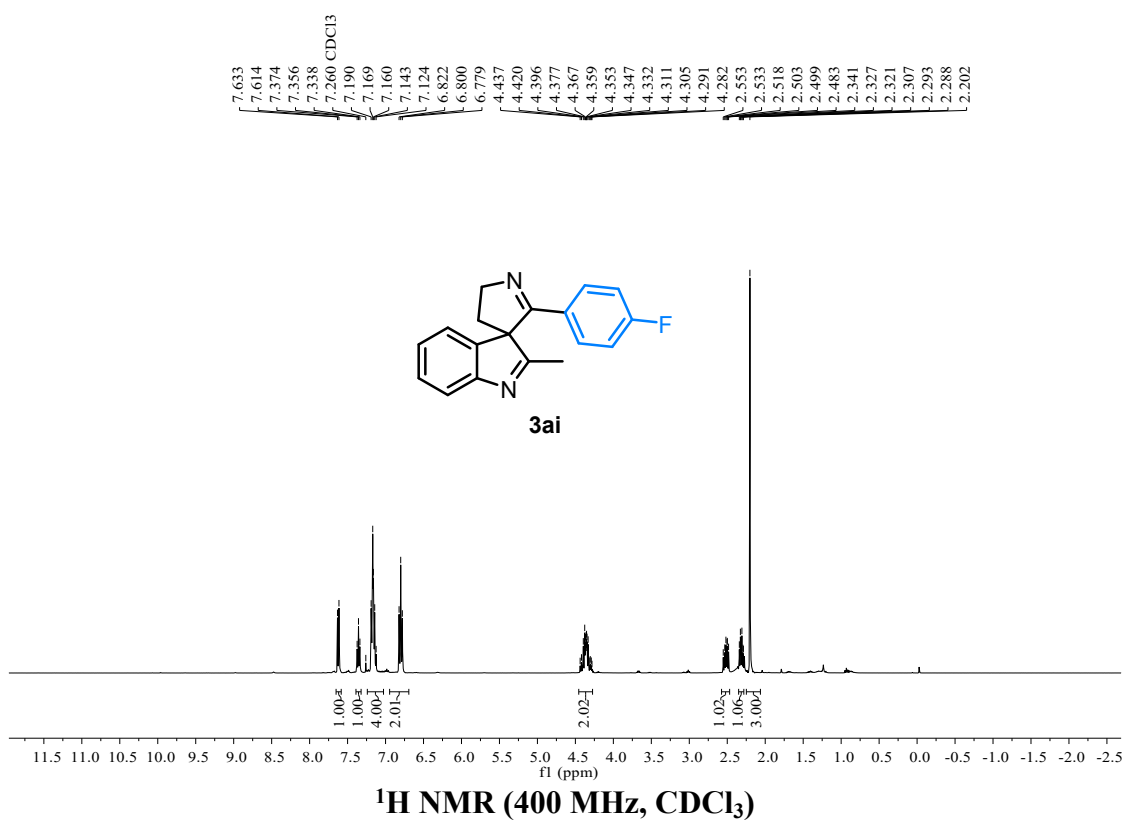

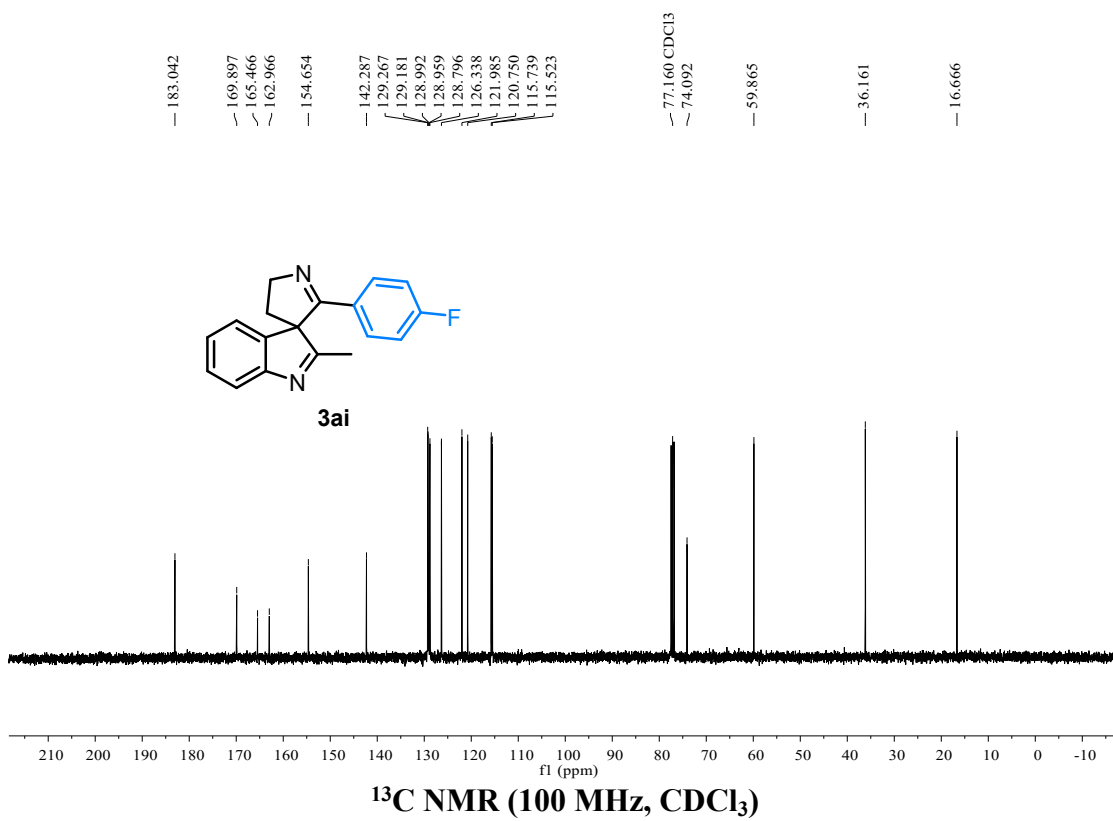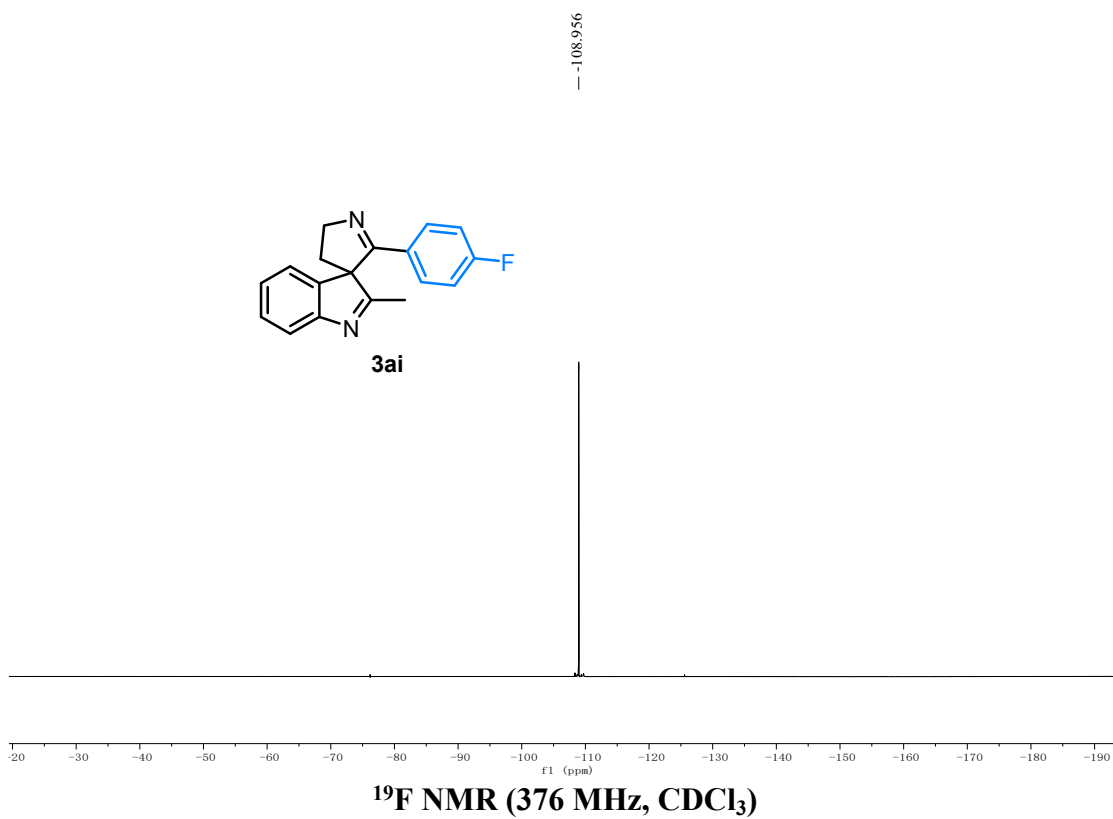

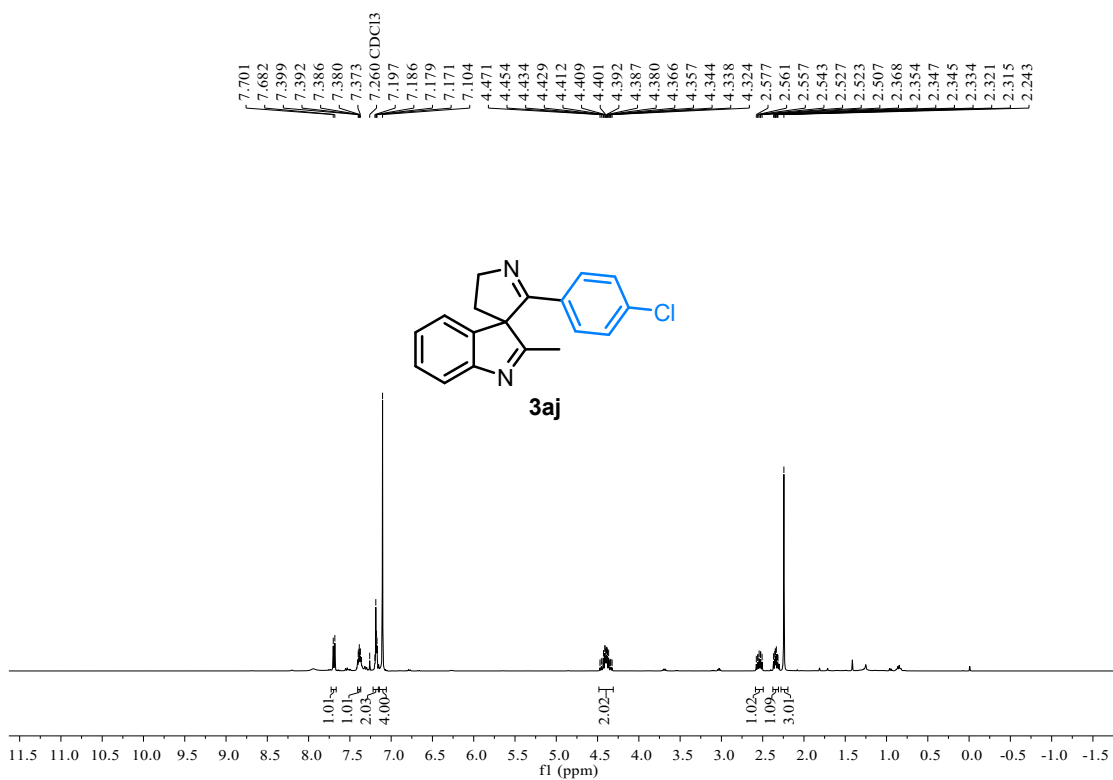

**<sup>1</sup>H NMR (400 MHz, CDCl<sub>3</sub>)**

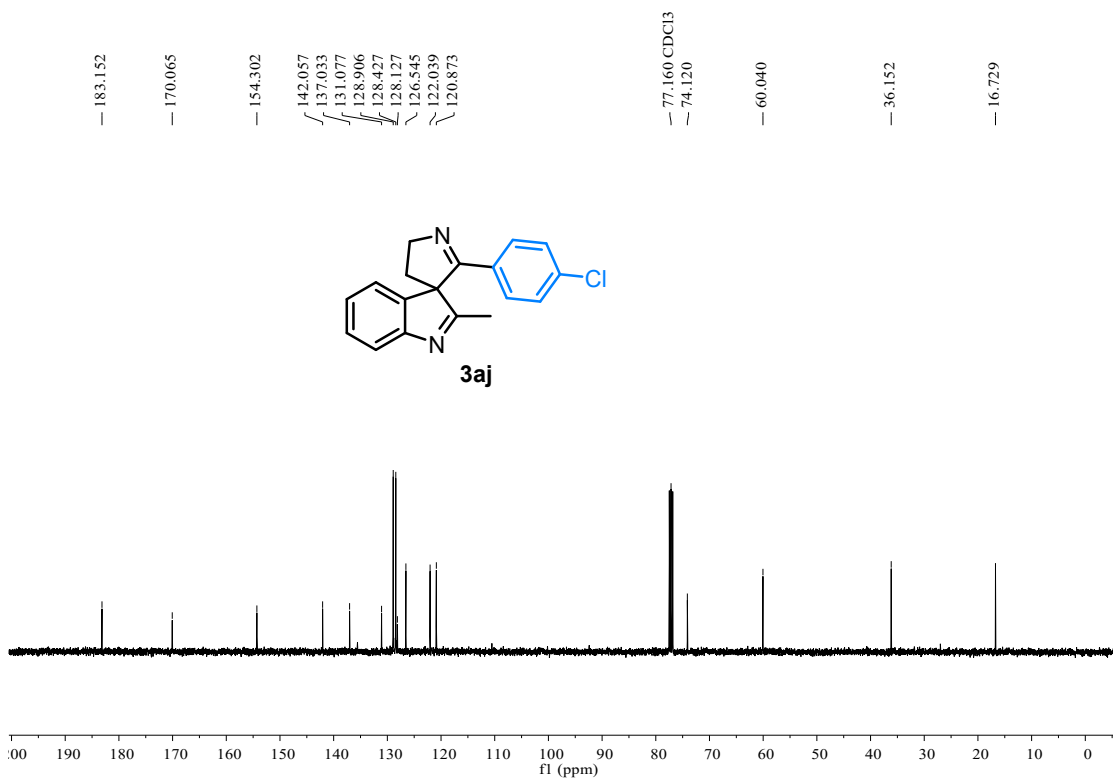

**<sup>13</sup>C NMR (100 MHz, CDCl<sub>3</sub>)**

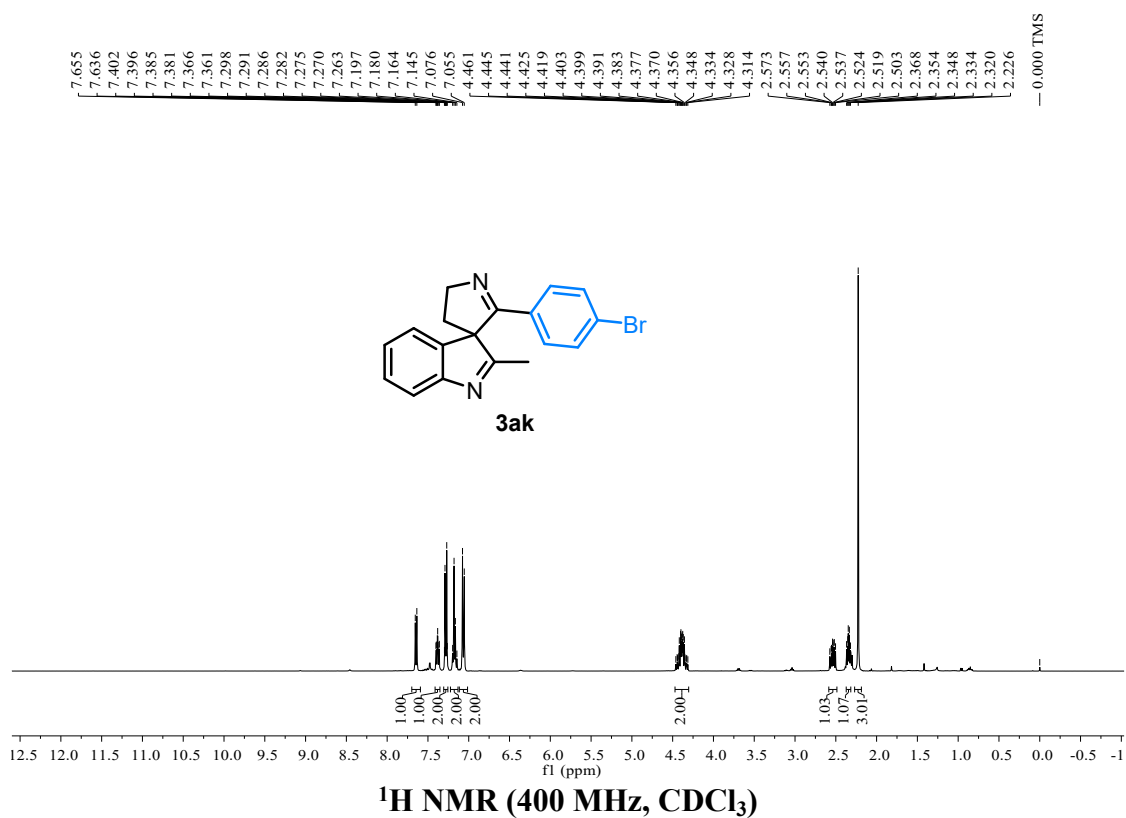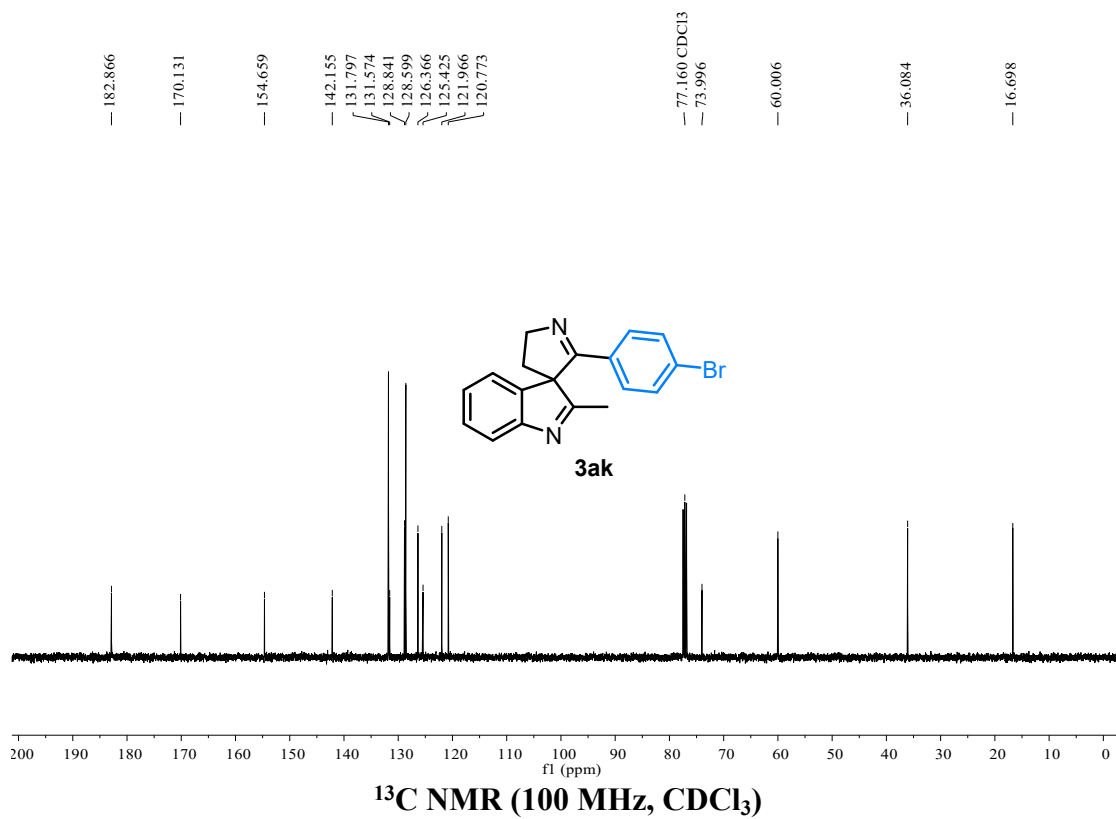



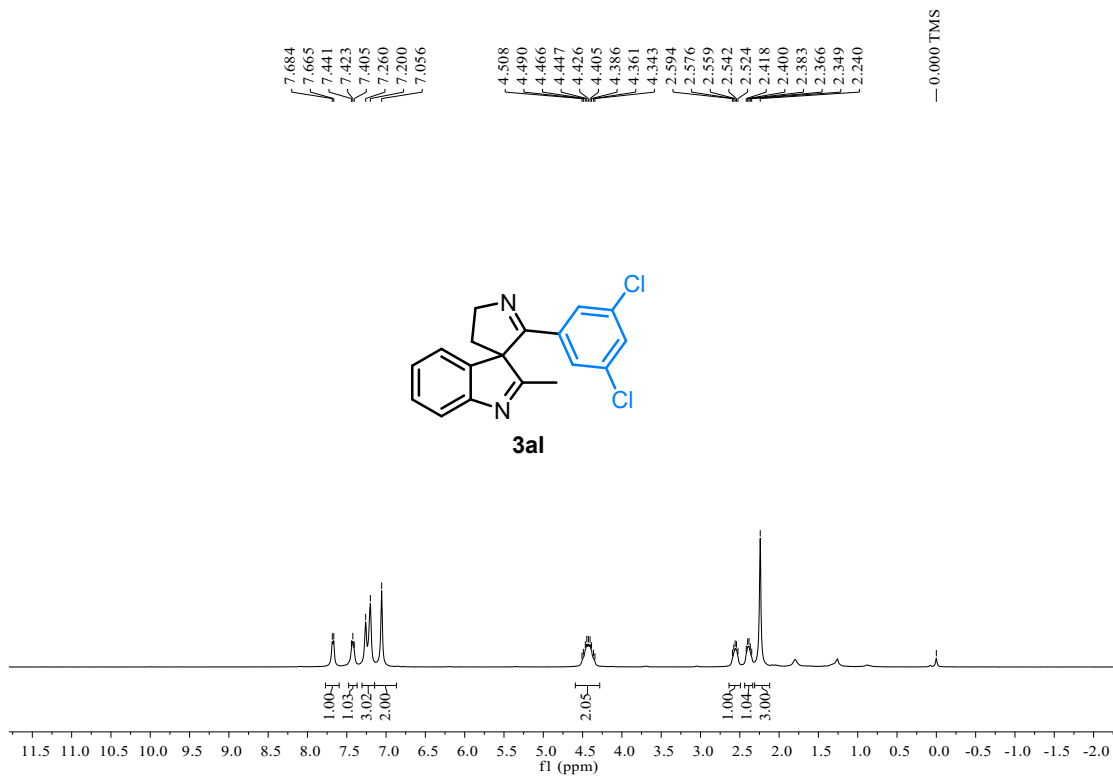

$^1\text{H NMR}$  (400 MHz,  $\text{CDCl}_3$ )

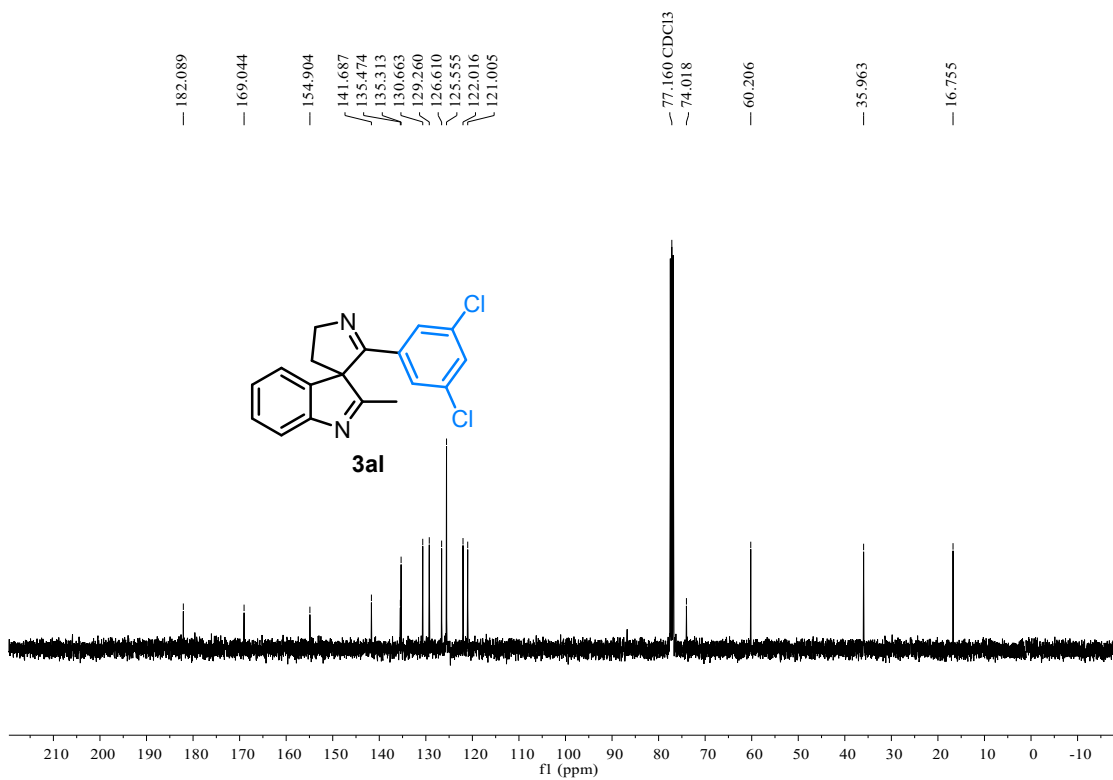

$^{13}\text{C NMR}$  (100 MHz,  $\text{CDCl}_3$ )

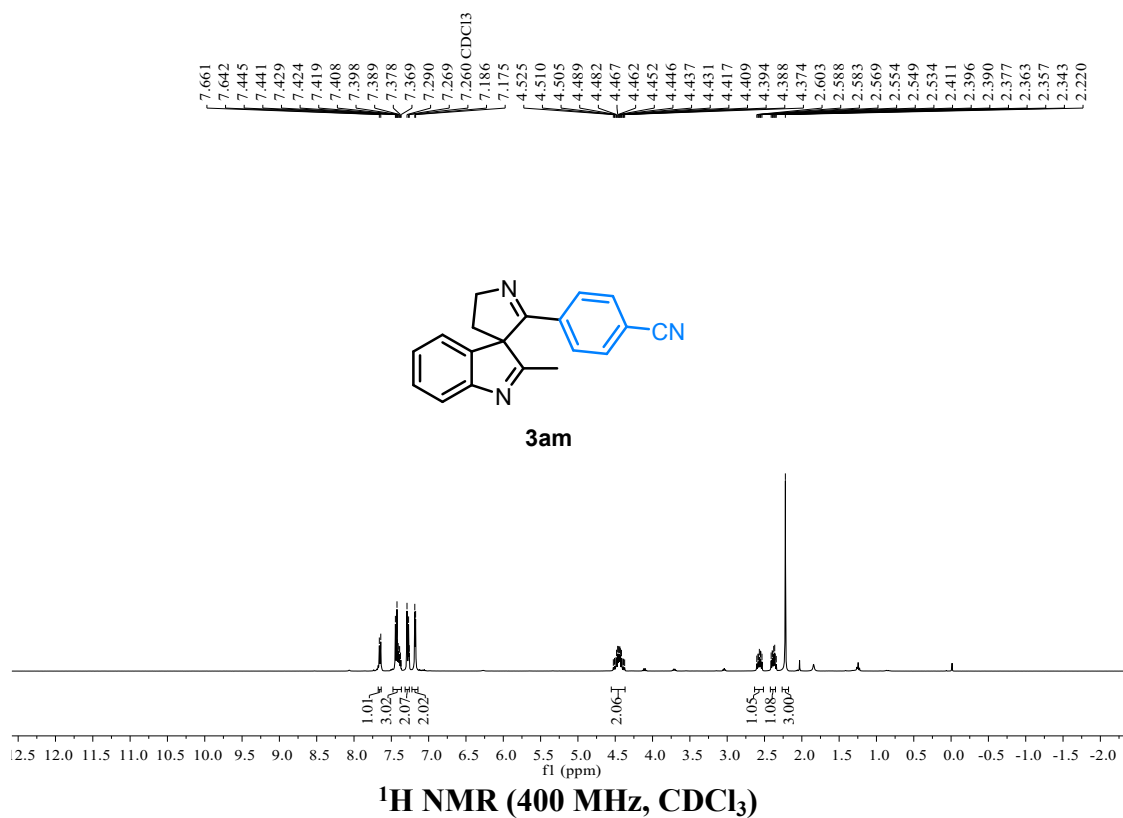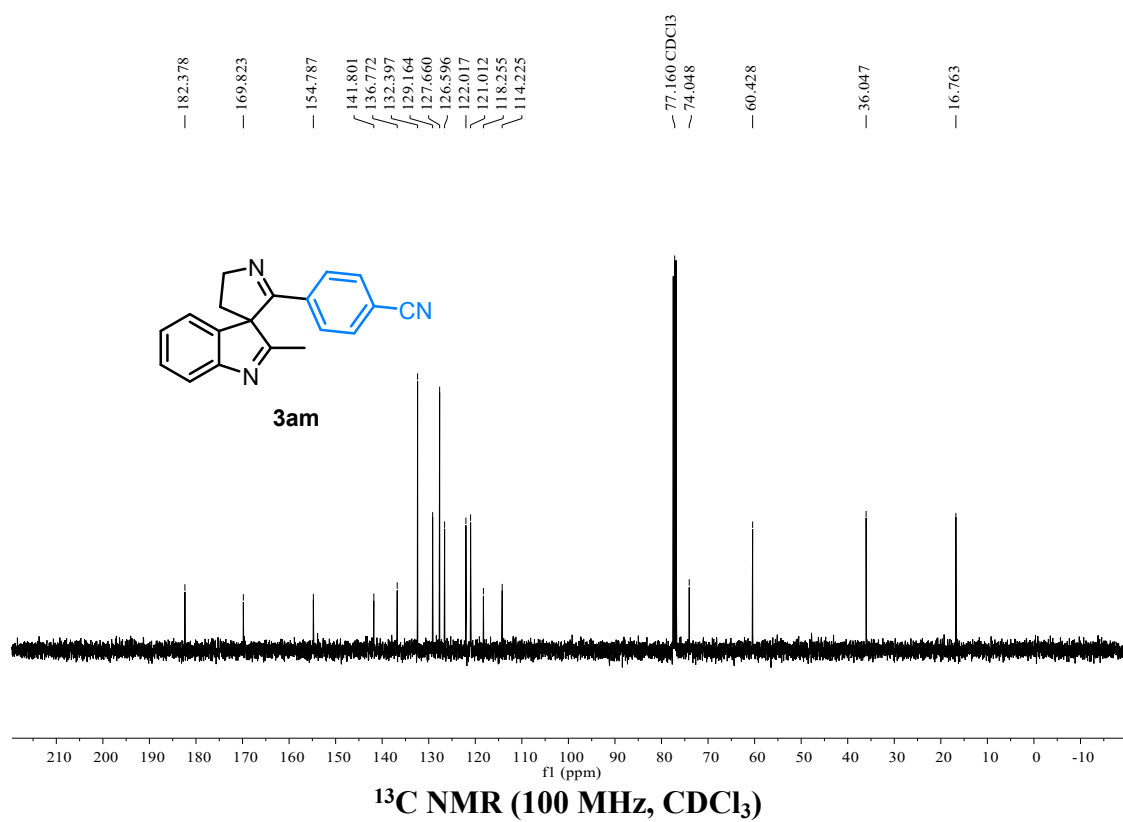

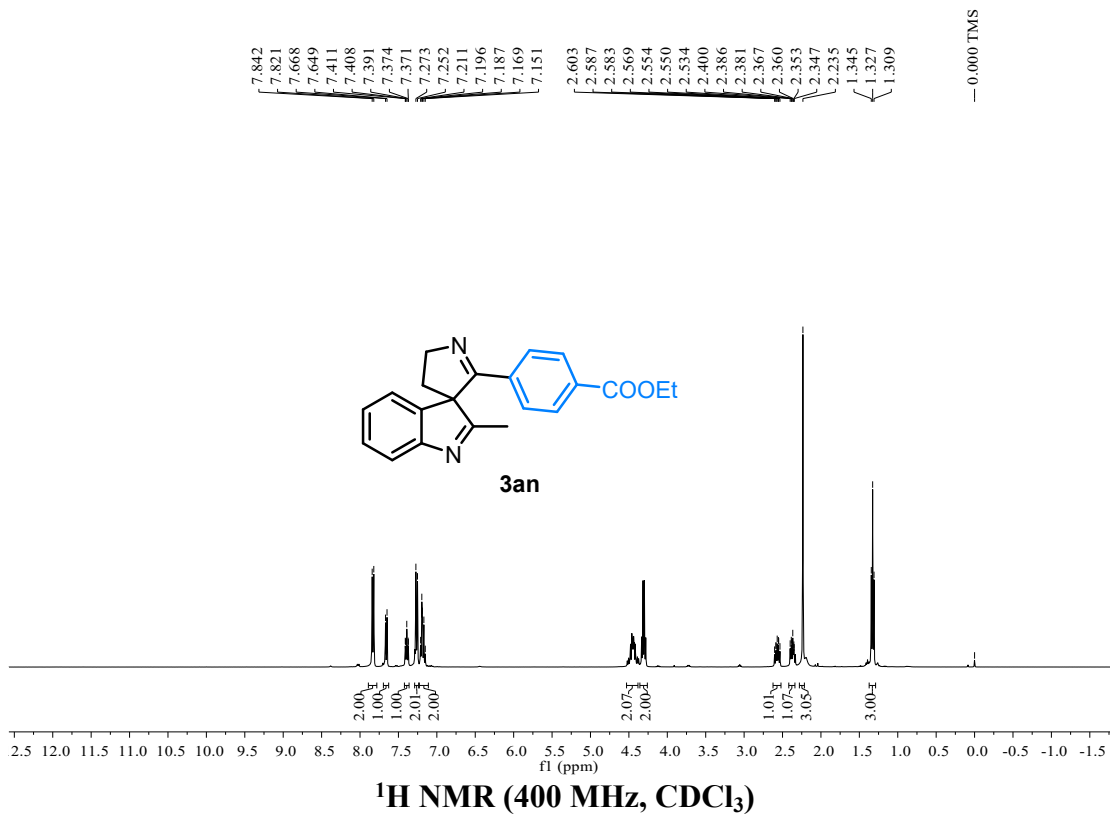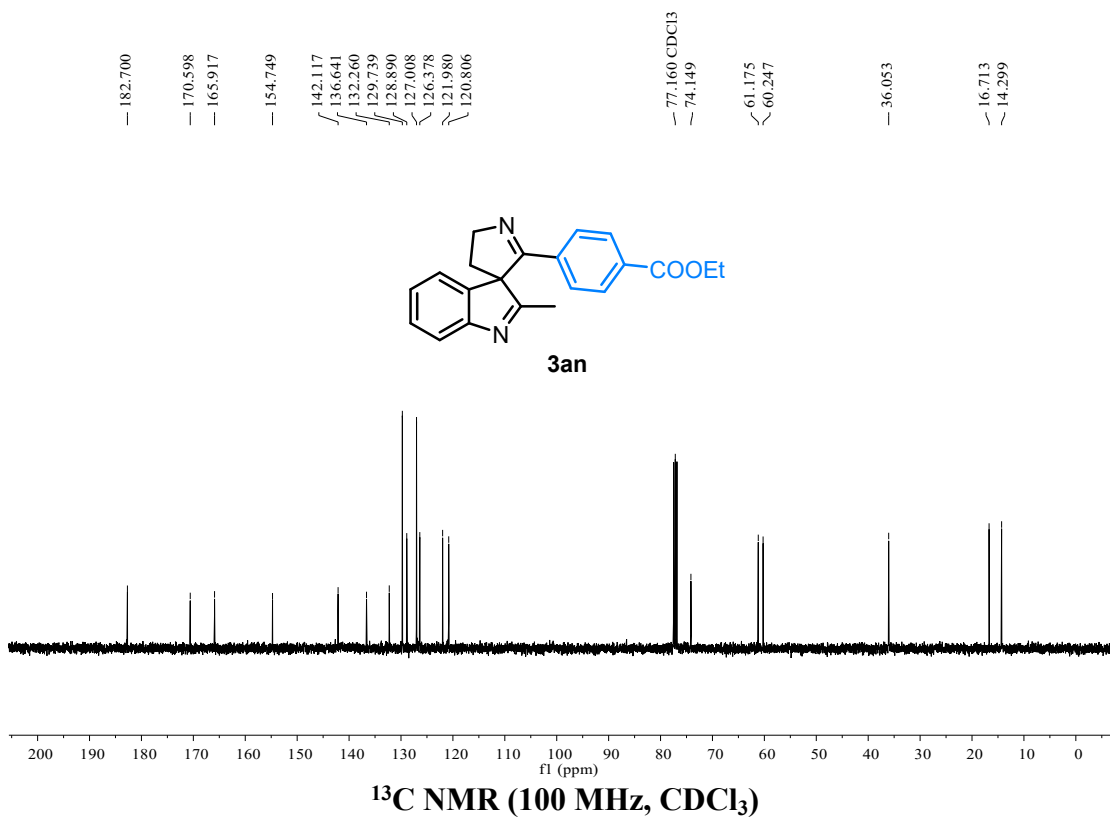

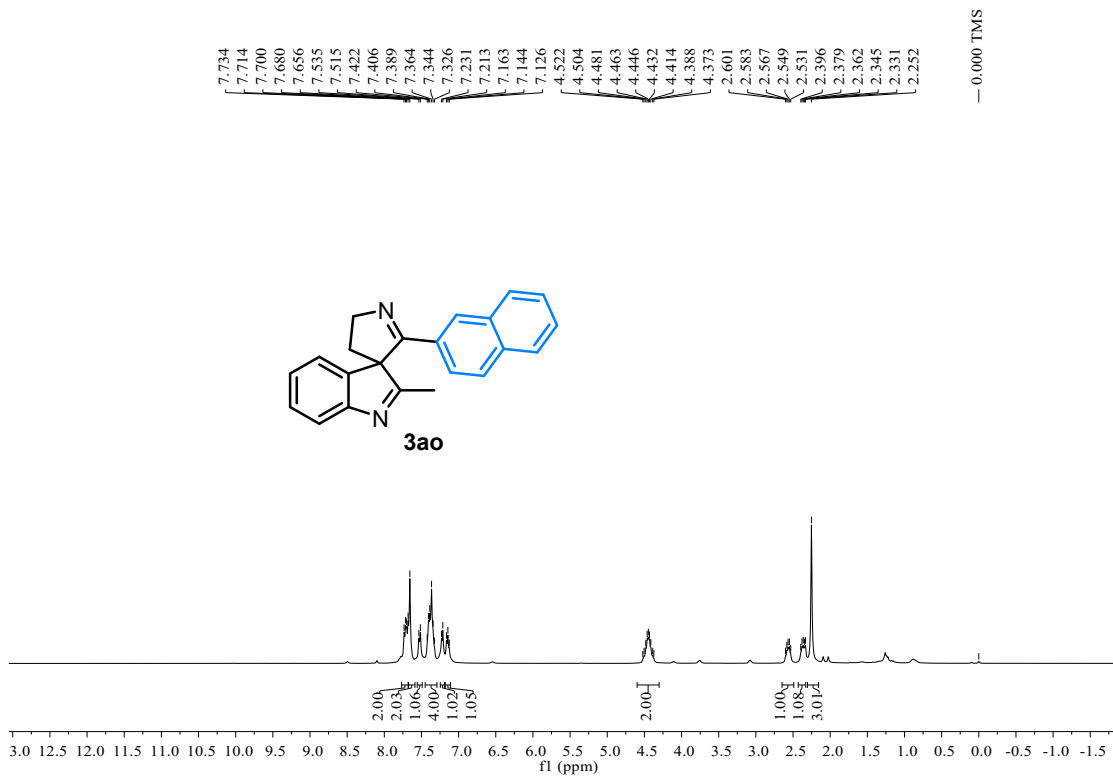

**<sup>1</sup>H NMR (400 MHz, CDCl<sub>3</sub>)**

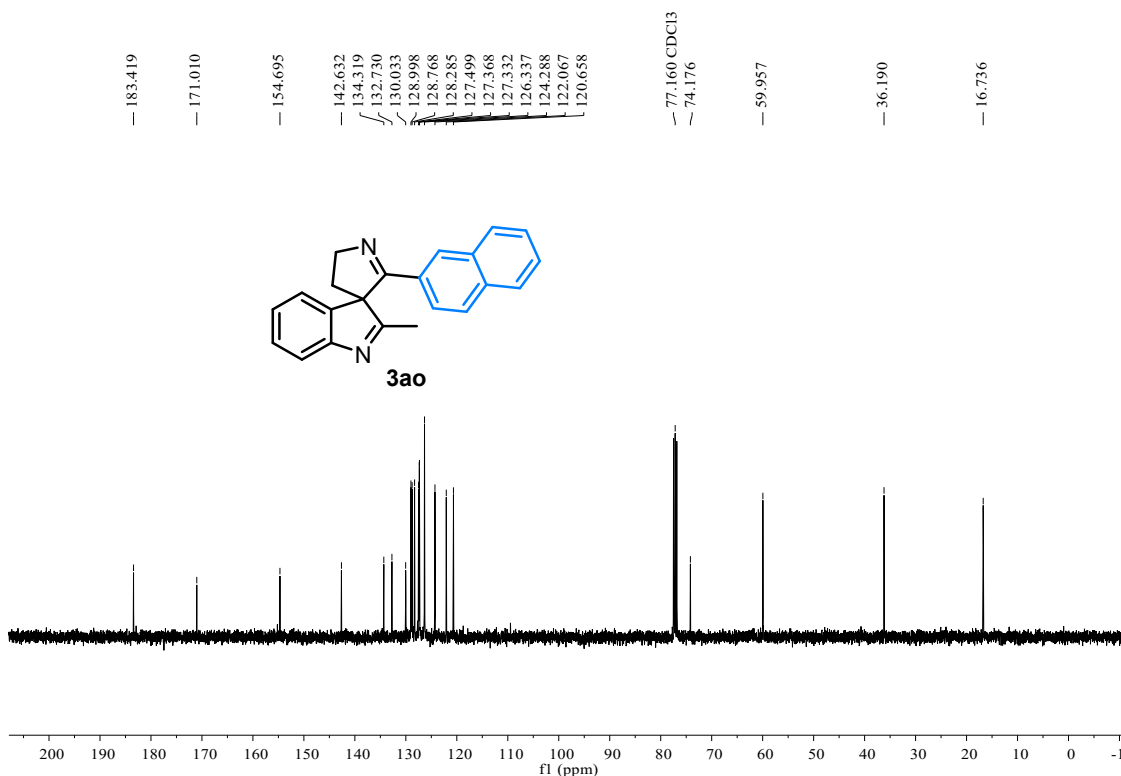

**<sup>13</sup>C NMR (100 MHz, CDCl<sub>3</sub>)**

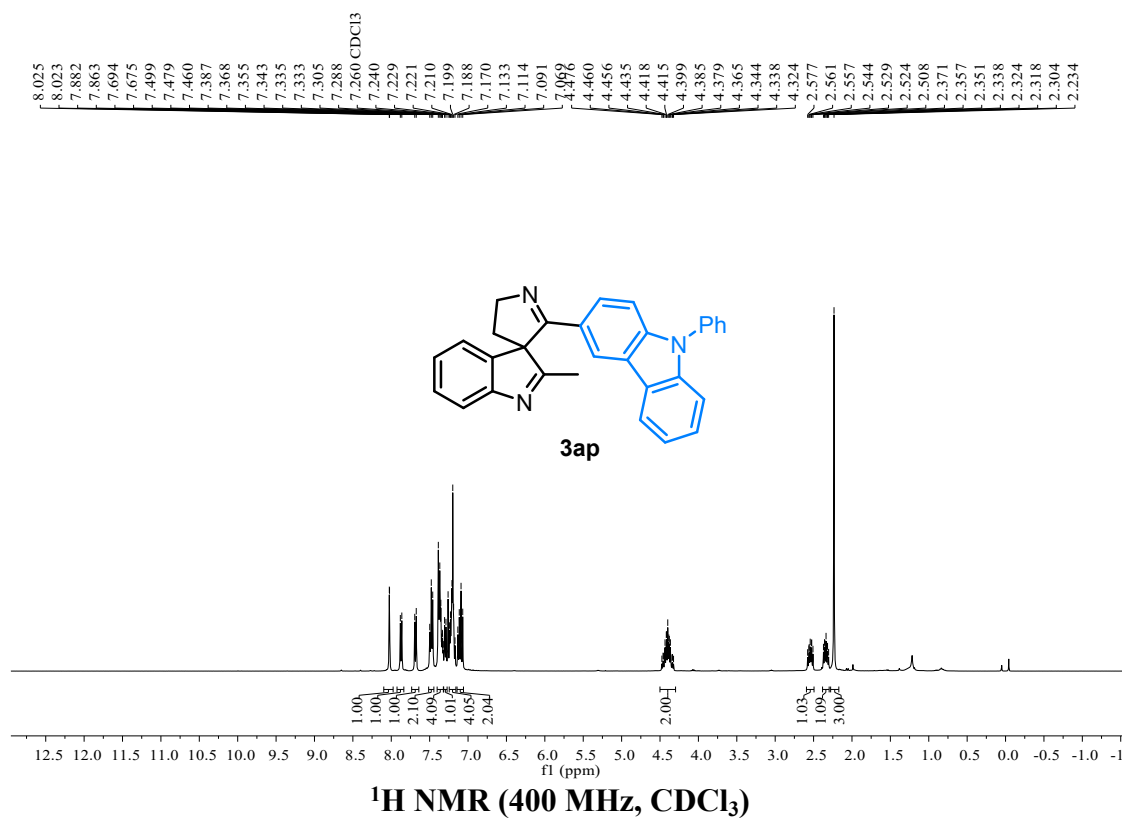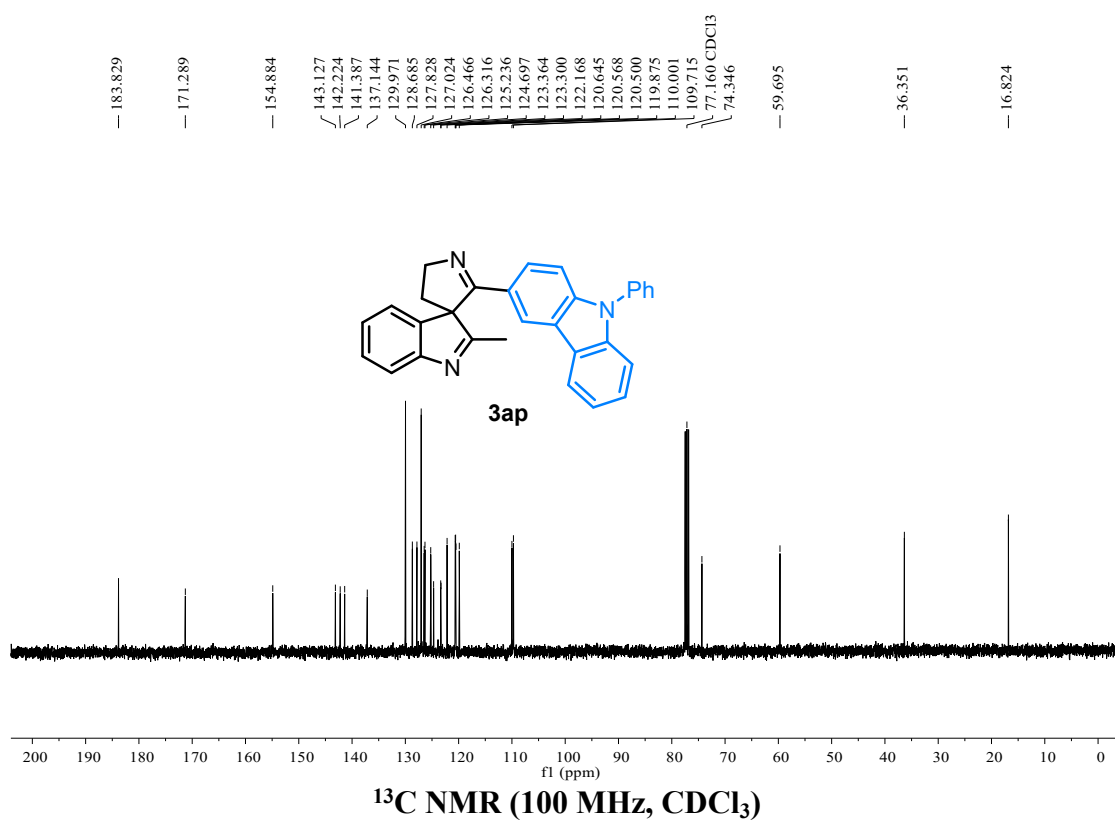

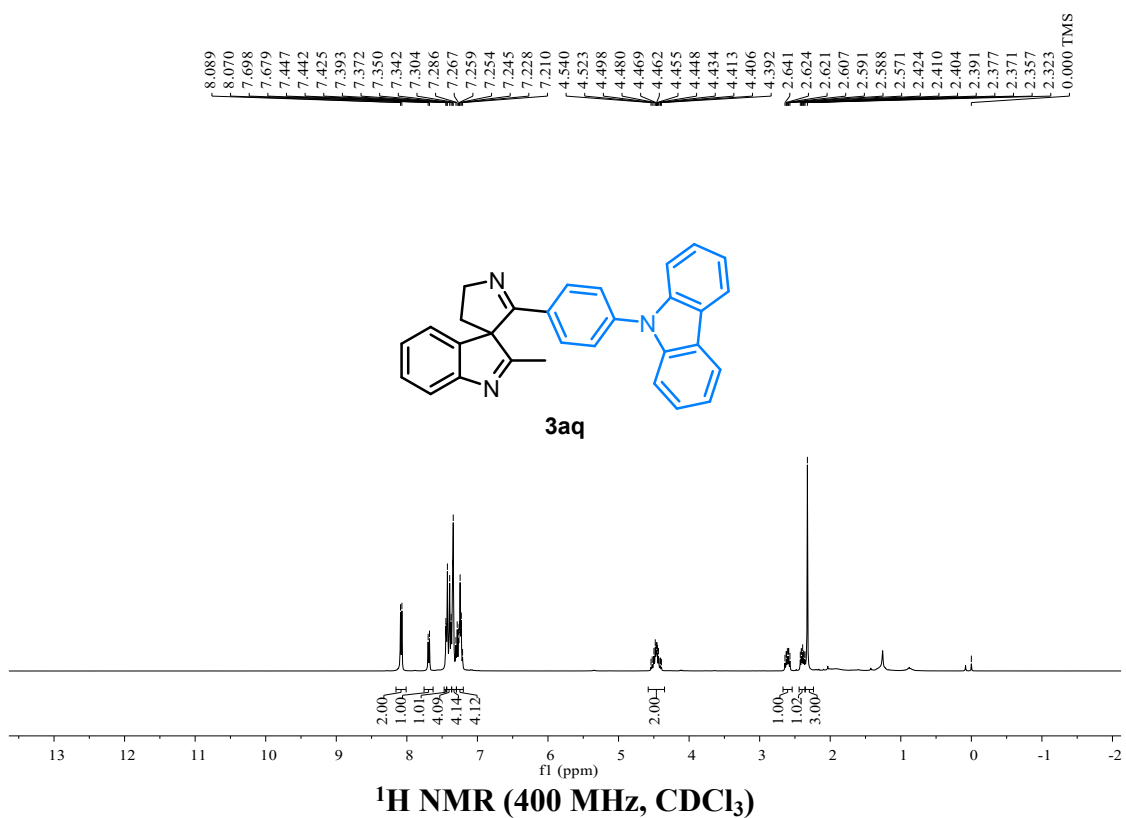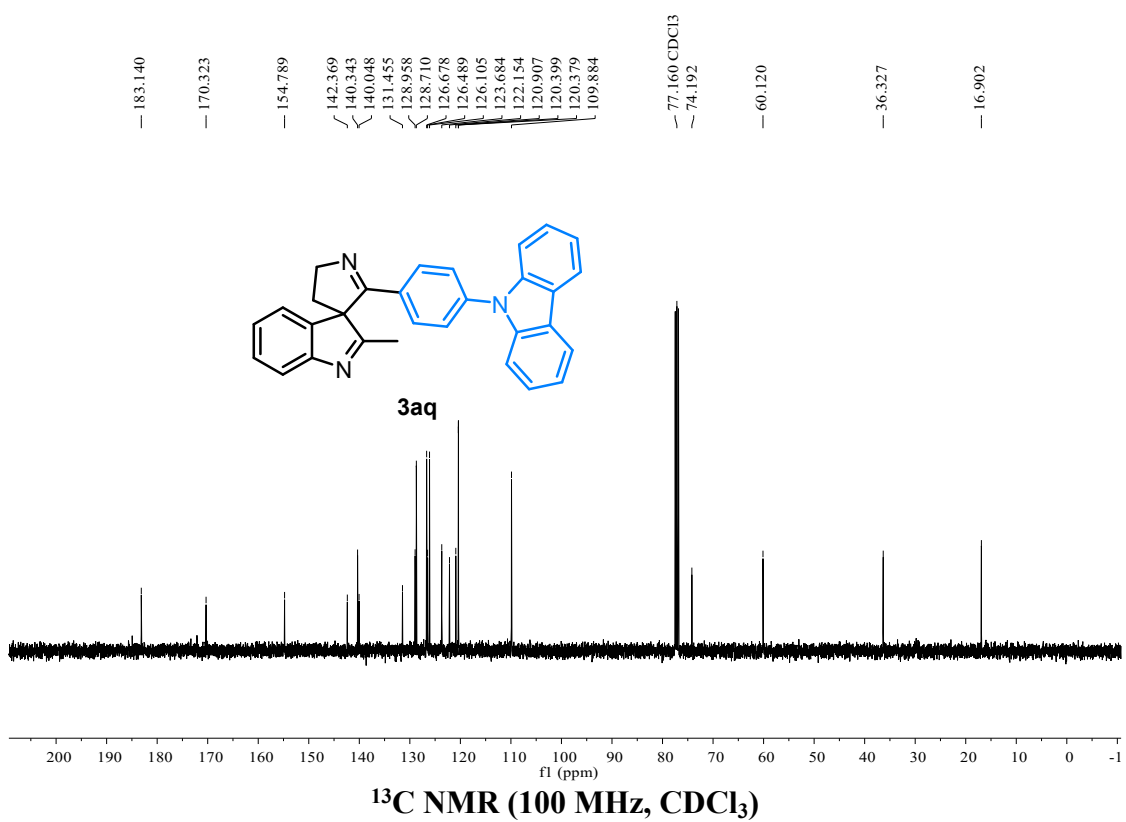

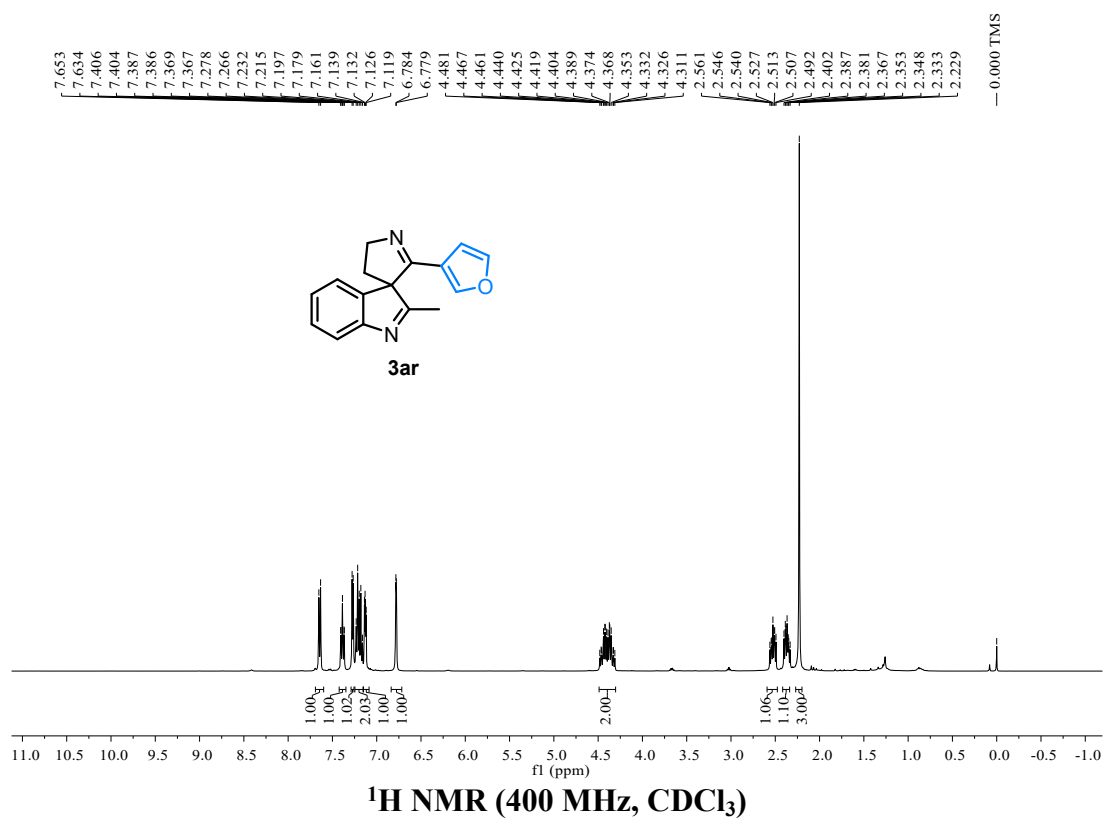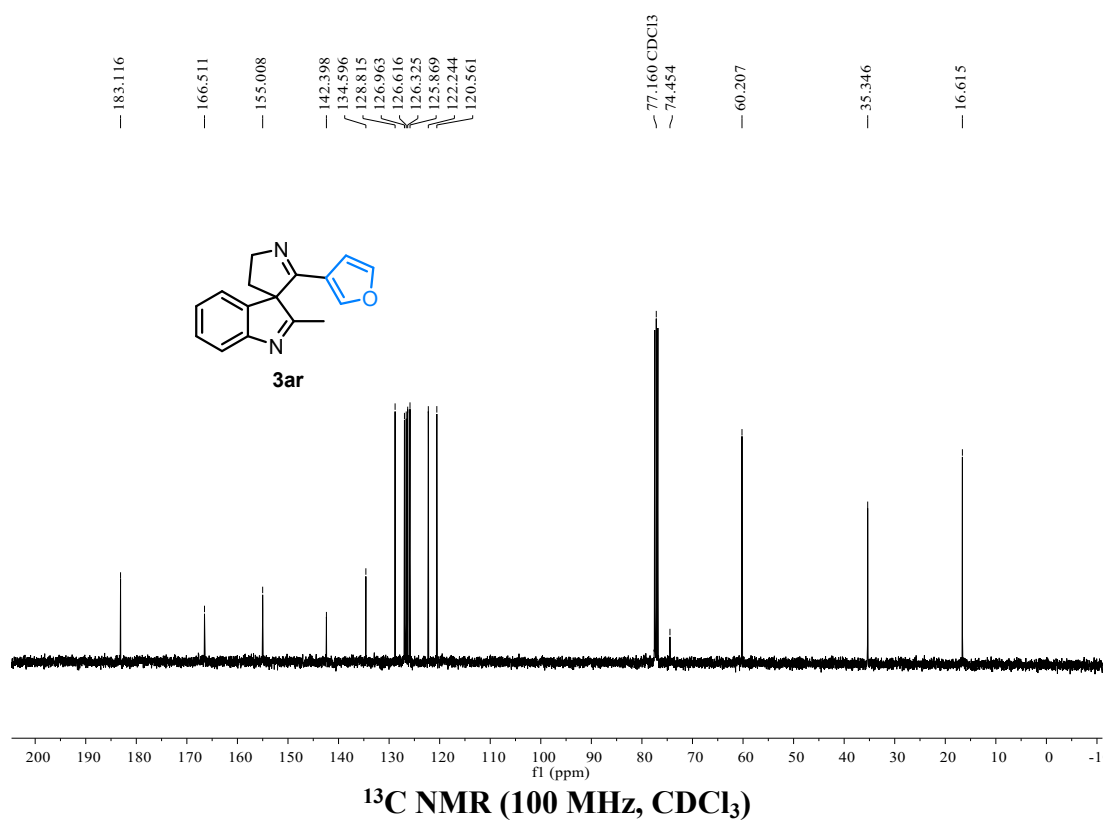

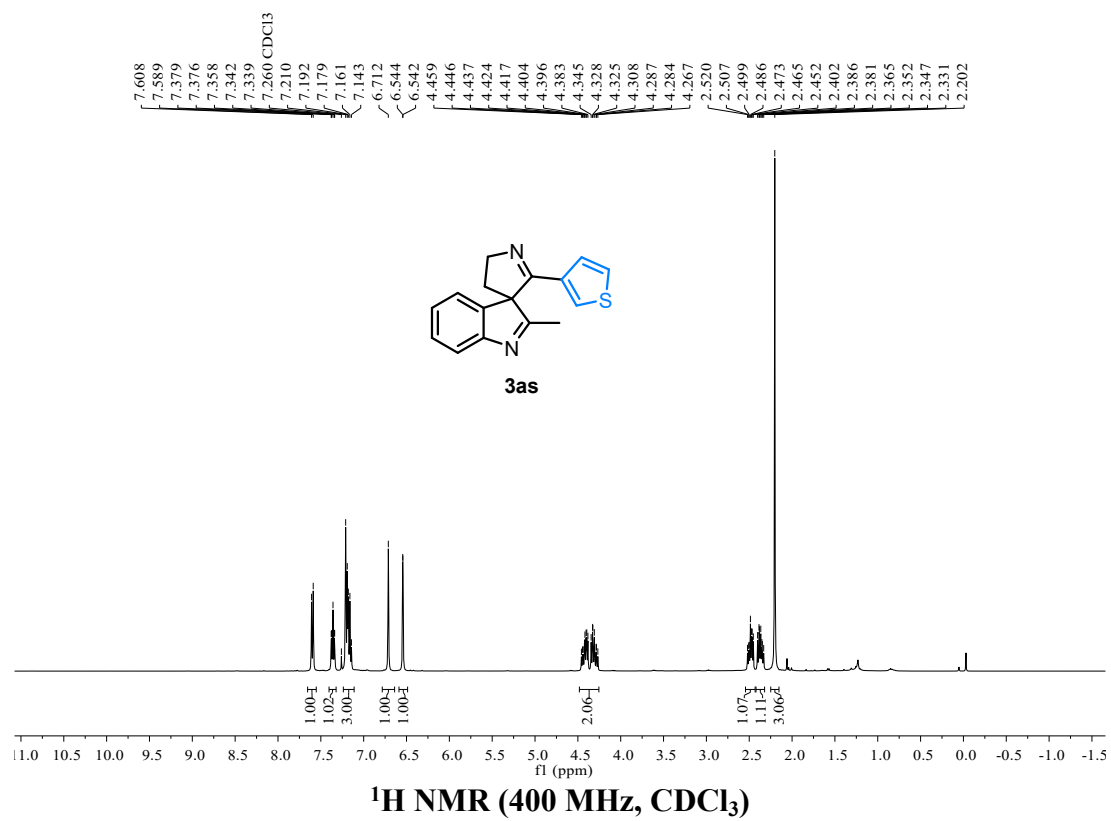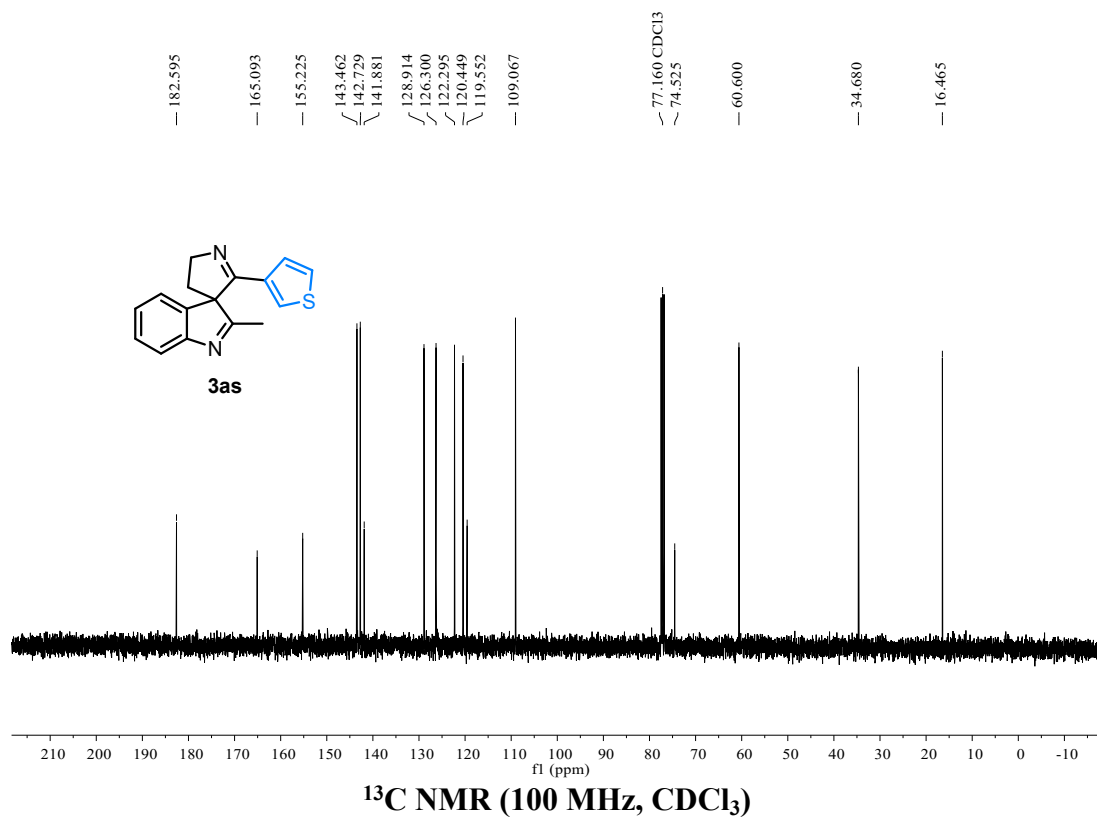



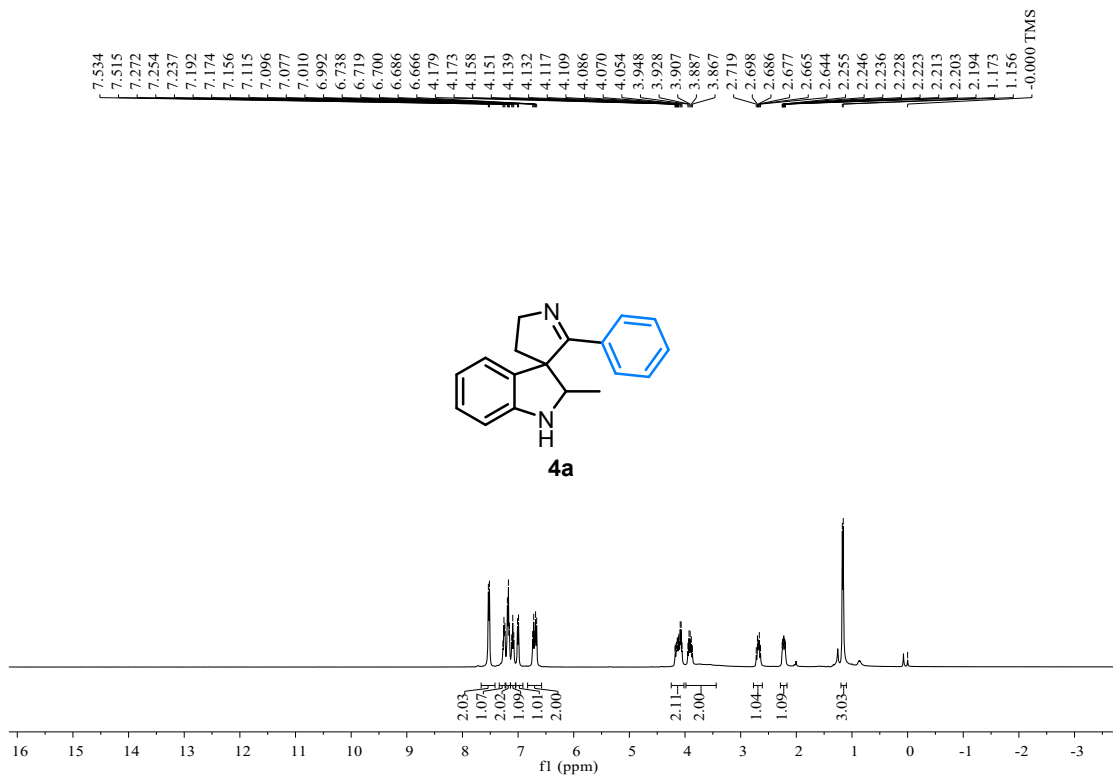

**<sup>1</sup>H NMR (400 MHz, CDCl<sub>3</sub>)**

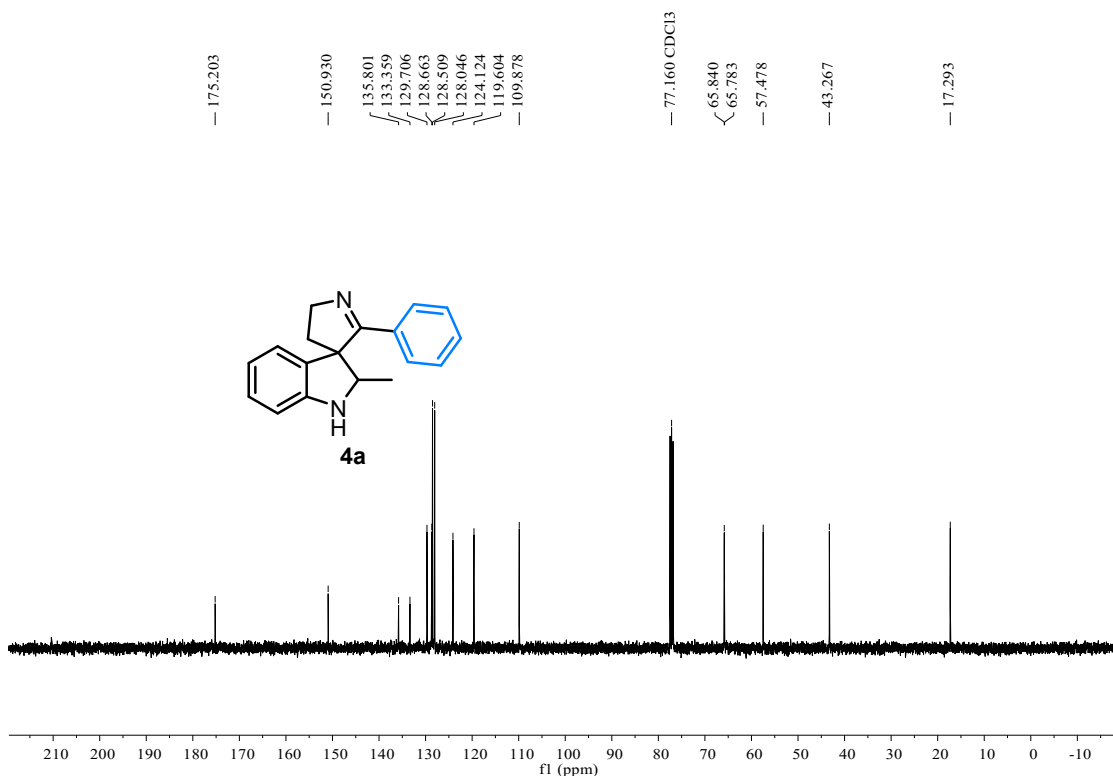

**<sup>13</sup>C NMR (100 MHz, CDCl<sub>3</sub>)**

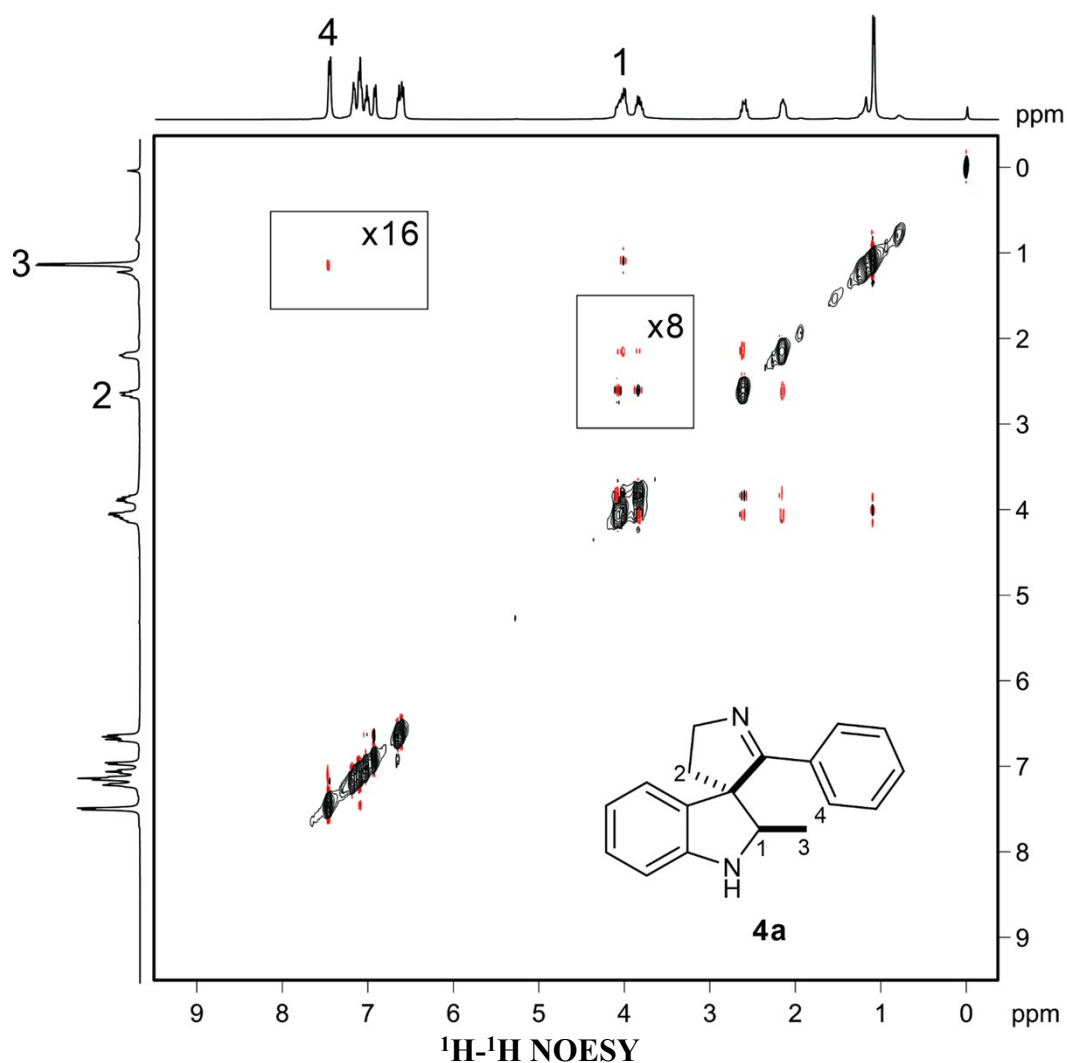

## 2. Crystal data and structure refinement for **3ia**.

Compound **3ia**: (The crystal structure of compound **3ia** has been deposited at the Cambridge Crystallographic Data Centre (CCDC 2102830). The data is available free of charge at [www.ccdc.cam.ac.uk/conts/retrieving.html](http://www.ccdc.cam.ac.uk/conts/retrieving.html).)

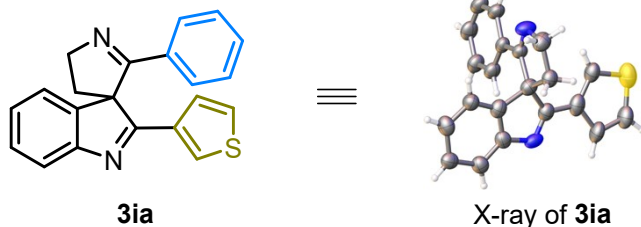

Crystal data and structure refinement for **3ia**.

Empirical formula

$C_{21}H_{16}N_2S$

|                                         |                                                   |                         |
|-----------------------------------------|---------------------------------------------------|-------------------------|
| Formula weight                          | 328.42                                            |                         |
| Temperature/K                           | 296                                               |                         |
| Wavelength                              | 1.54184 Å                                         |                         |
| Crystal system                          | monoclinic                                        |                         |
| Space group                             | P 1 21/c 1                                        |                         |
| Unit cell dimensions                    | a = 9.3674(7) Å                                   | $\alpha = 90.000^\circ$ |
|                                         | b = 23.7692(18) Å                                 | $\beta = 114.905^\circ$ |
|                                         | c = 8.4101(6) Å                                   | $\gamma = 90.000^\circ$ |
| Volume/Å <sup>3</sup>                   | 1698.4(2)                                         |                         |
| Z                                       | 4                                                 |                         |
| Density (calculated) g/cm <sup>3</sup>  | 1.284                                             |                         |
| Absorption coefficient/mm <sup>-1</sup> | 1.699                                             |                         |
| F(000)                                  | 688                                               |                         |
| Crystal size/mm <sup>3</sup>            | 0.4 × 0.35 × 0.3                                  |                         |
| Theta range for data collection/°       | 3.7190 to 77.4550                                 |                         |
| Index ranges                            | -11 ≤ h ≤ 11, -28 ≤ k ≤ 30, -10 ≤ l ≤ 6           |                         |
| Reflections collected                   | 3598                                              |                         |
| Independent reflections                 | 2474 [R(int) = 0.1459]                            |                         |
| Completeness to theta = 80.95 °         | 99.8%                                             |                         |
| Absorption correction                   | Multi-scan                                        |                         |
| Data / restranits / parameters          | 3598/529/217                                      |                         |
| Goodness-of-fit on F <sup>2</sup>       | 1.542                                             |                         |
| Final R indices [I>2sigma(I)]           | R <sub>1</sub> = 0.1459, wR <sub>2</sub> = 0.3972 |                         |
| Final R indices [all data]              | R <sub>1</sub> = 0.1780, wR <sub>2</sub> = 0.4383 |                         |
